# Supplementary material for: Omission of axillary lymph node dissection in early-stage breast cancer with limited sentinel lymph node metastasis: A propensity score-matched analysis
Source: Research Square preprint supplement (doi:10.21203/rs.3.rs-7969539/v1), 2026-01-20
Supplement: Supplementary file 1 [file d45c0cb18b2ec5b64ad0a47c.xlsx]

## Sheet: Sheet1
group	age	tumor size	T stage	Surgury	Micropapillary carcinoma	Vascular invasion	grade	No. of positive SLN	No. of removed SLN	Total number of lymph node metastases	ER	PR	HR	Her-2	KI-67	chemotharapy	radiotharapy	time 1	status 1	time 2	status 2
1	54	1.5	1	1	0	1	2	1	6	1	1	1	1	0	1	NA	0	114	0	114	0
1	40	1.3	1	1	0	0	3	2	5	2	1	1	1	0	1	1	0	58	1	58	1
1	41	NA	NA	1	0	NA	NA	1	3	1	1	1	1	0	1	1	0	114	0	114	0
1	41	2.3	2	1	0	1	2	1	7	1	1	1	1	1	1	1	0	114	0	111	0
1	61	2.5	2	1	0	0	3	1	3	1	1	1	1	1	1	1	1	114	0	114	0
1	46	1.8	1	2	0	1	3	1	3	1	NA	NA	NA	NA	NA	1	1	103	0	103	0
1	47	NA	NA	1	0	1	NA	2	5	2	1	1	1	NA	1	1	0	113	0	113	0
1	74	1.5	1	1	0	0	2	2	5	2	1	1	1	0	0	1	1	111	0	111	0
1	51	0.8	1	1	0	NA	NA	2	7	2	1	1	1	0	1	1	1	111	0	111	0
1	56	3.3	2	1	0	0	3	2	7	2	1	1	1	1	1	1	1	112	0	112	0
1	45	3.5	2	1	0	1	2	1	4	2	1	1	1	0	1	1	1	111	0	111	0
1	61	2.5	2	1	0	1	2	1	4	1	1	1	1	0	1	NA	NA	111	0	111	0
1	29	NA	NA	1	0	NA	NA	3	5	6	1	1	1	0	1	1	1	101	0	101	0
1	55	2.5	2	1	0	0	3	4	4	5	1	1	1	0	1	1	1	110	0	110	0
1	52	3	2	1	0	1	2	2	5	3	1	1	1	1	0	1	0	110	0	110	0
1	40	2	1	1	0	0	3	1	3	1	1	1	1	0	1	1	0	86	0	86	0
1	46	1.9	1	2	0	0	3	1	3	1	1	1	1	1	1	1	1	74	0	74	0
1	45	1.5	1	2	0	0	3	3	5	5	1	1	1	0	1	1	1	110	0	110	0
1	60	2.3	2	2	0	NA	NA	1	7	1	0	0	0	0	1	1	1	58	0	58	0
1	58	3	2	1	0	1	2	2	2	12	1	1	1	NA	1	1	1	109	0	109	0
1	39	1.8	1	2	0	0	3	2	4	2	1	1	1	0	1	1	1	109	0	109	0
1	50	2	1	1	0	1	3	1	3	5	1	1	1	1	1	1	1	109	0	109	0
1	53	2.3	2	1	0	0	2	1	4	1	1	1	1	0	1	1	0	109	0	109	0
1	46	2.8	2	1	0	NA	2	1	6	1	1	1	1	0	1	1	0	109	0	109	0
1	33	1.8	1	1	0	NA	3	2	4		0	0	0	0	1	1	1	33	1	33	1
1	47	1	1	1	0	NA	NA	1	5	3	0	0	0	1	1	1	1	108	0	108	0
1	42	1.5	1	1	0	0	2	1	4	1	1	1	1	0	1	1	1	85	0	85	0
1	29	NA	NA	2	0	NA	NA	3	5	3	1	1	1	0	1	1	0	108	1	63	1
1	48	1.8	1	1	0	0	2	1	6	4	1	1	1	0	1	1	1	108	0	108	0
1	51	1.6	1	1	0	NA	2	1	5	1	1	1	1	0	1	1	0	108	0	108	0
1	51	1.8	1	2	0	0	1	2	4	3	1	1	1	0	0	1	1	108	0	108	0
1	41	2.5	1	1	0	0	2	1	4	2	1	1	1	0	1	1	1	107	0	107	0
1	48	1.5	1	1	0	NA	2	2	4	19	1	1	1	0	1	1	1	106	0	106	0
1	59	1.5	1	1	0	0	2	1	3	1	NA	NA	NA	0	NA	0	0	107	0	107	0
1	49	1.5	1	2	0	NA	NA	1	4	1	1	1	1	NA	0	1	1	106	0	106	0
1	61	0.4	1	1	0	NA	2	1	3	1	1	1	1	0	1	1	0	106	0	106	0
1	39	1.5	1	1	0	0	NA	1	4	1	0	0	0	1	1	1	1	106	0	106	0
1	53	1.5	1	1	0	0	2	1	2	1	1	0	1	0	1	1	0	107	0	107	0
1	70	3.5	2	1	0	NA	2	1	1	1	1	1	1	0	1	1	1	106	0	106	0
1	32	NA	NA	1	0	NA	NA	2	4	2	1	1	1	0	1	1	1	56	1	56	1
1	50	1.2	1	1	0	1	2	4	4	17	1	1	1	0	1	1	1	106	0	106	0
1	33	NA	NA	1	0	NA	NA	1	3	1	0	0	0	1	1	1	0	105	0	105	0
1	30	1.9	1	1	0	0	2	1	1	1	1	1	1	0	1	1	1	19	1	19	1
1	63	2.5	2	2	0	0	2	1	2	1	1	1	1	0	1	1	1	105	0	105	0
1	57	1.5	1	1	1	NA	NA	1	2	2	1	1	1	0	1	1	1	82	0	82	0
1	65	1.8	1	1	0	NA	NA	1	5	1	1	1	1	NA	1	1	1	105	0	93	0
1	65	1.7	1	2	0	0	2	1	7	4	1	1	1	NA	1	1	1	104	0	104	0
1	39	NA	NA	1	0	NA	3	1	5	1	1	1	1	1	1	NA	NA	104	0	104	0
1	72	4	2	1	0	0	NA	1	5	1	1	1	1	0	1	1	1	81	0	81	0
1	37	1	1	1	0	0	2	1	7	1	1	1	1	0	1	1	1	104	0	104	0
1	51	2.2	2	1	0	NA	2	1	4	3	1	1	1	0	1	1	0	104	0	80	0
1	64	2	1	1	0	NA	2	1	5	1	1	1	1	0	1	1	0	105	0	105	0
1	65	1.5	1	1	1	0	NA	1	4	2	1	1	1	NA	1	1	0	104	0	104	0
1	40	1.5	1	1	0	0	2	1	3	1	1	1	1	1	1	1	0	104	0	104	0
1	29	2.5	2	1	0	0	2	1	4	1	1	1	1	0	1	1	1	103	0	103	0
1	41	1.5	1	2	0	0	2	1	4	1	1	1	1	0	1	1	1	103	0	103	0
1	43	2.5	2	1	0	NA	2	3	6	3	1	0	1	1	1	1	1	103	0	103	0
1	36	NA	2	2	0	NA	NA	1	3	1	1	1	1	1	1	1	1	45	0	45	0
1	47	NA	NA	1	0	NA	NA	1	3	2	0	0	0	0	1	1	1	102	0	102	0
1	50	1.8	1	1	0	NA	2	1	2	1	1	1	1	0	1	1	0	102	0	102	0
1	39	1.8	1	1	0	NA	2	1	2	7	1	1	1	NA	1	1	1	102	0	102	0
1	52	2.5	2	1	0	NA	2	2	4	2	1	1	1	1	1	1	1	102	0	102	0
1	48	NA	NA	1	0	NA	3	1	3	1	1	1	1	NA	1	1	1	102	0	102	0
1	50	1.8	1	1	0	NA	2	1	5	2	1	1	1	0	1	1	1	101	0	101	0
1	53	1.5	1	1	0	1	2	1	2	1	1	1	1	1	1	1	1	101	0	101	0
1	57	1.2	1	1	0	0	3	2	3	26	1	1	1	1	1	1	1	100	0	100	0
1	46	2.5	1	1	0	NA	2	1	2	12	1	1	1	0	1	1	1	100	0	100	0
1	58	NA	NA	1	0	1	NA	1	5	1	1	1	1	1	1	1	0	33	0	33	0
1	48	1.8	1	1	0	NA	1	3	6	3	1	1	1	0	1	1	1	99	0	99	0
1	45	1.2	1	1	0	NA	NA	1	2	1	1	1	1	0	1	1	0	99	0	99	0
1	40	NA	NA	1	0	1	2	1	3	4	1	1	1	0	1	NA	NA	99	0	99	0
1	48	2.2	2	1	0	NA	3	1	3	1	1	1	1	1	1	1	1	99	0	99	0
1	38	4.5	2	1	0	NA	NA	3	6	3	1	1	1	1	1	1	1	99	0	99	0
1	41	2	1	2	0	0	2	1	3	1	1	1	1	0	1	1	0	99	0	99	0
1	54	1.3	1	1	0	1	2	3	4	6	1	1	1	0	1	1	1	99	0	99	0
1	44	0.2	1	1	0	0	1	3	4	3	1	1	1	0	0	1	0	60	0	60	0
1	44	NA	NA	1	0	0	NA	2	4	3	1	1	1	0	1	1	0	75	1	75	1
1	68	1.5	1	1	0	0	2	1	4	2	1	1	1	0	0	1	0	98	0	98	0
1	31	NA	NA	2	0	NA	NA	2	4	2	1	1	1	1	1	1	1	99	0	99	0
1	74	1.5	1	1	0	0	2	1	3	1	1	1	1	0	1	0	0	98	0	98	0
1	31	NA	NA	1	0	NA	NA	1	3	1	0	0	0	1	1	1	1	98	0	98	0
1	61	NA	NA	1	0	NA	NA	2	4	4	1	1	1	NA	1	1	0	98	0	98	0
1	47	1.2	1	1	0	0	1	2	4	2	1	1	1	0	0	1	1	98	0	98	0
1	43	NA	NA	1	1	NA	NA	1	1	1	1	1	1	0	1	1	0	98	0	98	0
1	49	1	1	1	0	0	2	1	1	1	1	1	1	0	1	1	0	98	0	98	0
1	29	3	2	1	0	NA	2	2	3	3	1	1	1	0	1	NA	1	98	0	98	0
1	69	3	2	1	0	0	NA	1	3	3	1	1	1	0	1	1	0	57	1	45	1
1	73	4	2	1	0	0	3	5	13	5	1	1	1	1	1	1	0	34	1	33	1
1	35	1.5	1	2	0	0	3	1	4	1	0	0	0	1	1	1	0	97	0	97	0
1	58	2	1	1	0	NA	2	2	3	2	1	1	1	0	1	1	1	97	0	97	0
1	40	1.8	1	1	0	NA	2	1	1	1	1	1	1	0	1	1	0	97	0	97	0
1	48	0.8	1	1	0	0	2	2	4	2	1	1	NA	0	1	1	1	96	0	96	0
1	49	NA	1	1	0	0	2	1	2	1	1	1	1	0	0	1	0	81	0	81	0
1	79	2	1	1	0	NA	2	1	3	1	1	1	1	0	1	0	0	96	0	96	0
1	52	2.7	2	1	0	NA	2	1	4	1	1	1	1	1	1	1	0	96	0	96	0
1	34	2.5	2	1	0	NA	2	1	4	1	1	1	1	0	1	1	1	96	0	96	0
1	38	3.5	2	1	0	NA	2	1	4	1	1	1	1	0	1	1	0	96	0	96	0
1	63	1.5	1	1	0	NA	3	1	2	1	0	0	0	0	1	1	0	96	0	96	0
1	53	2.4	2	1	0	0	2	3	5	3	1	1	1	0	1	1	1	96	0	96	0
1	29	NA	NA	2	0	NA	NA	1	3	2	1	1	1	NA	1	1	1	95	0	95	0
1	49	1.5	1	1	1	1	2	2	4	2	1	1	1	0	1	1	1	95	0	95	0
1	53	2.5	2	1	0	NA	2	1	5	1	1	1	0	NA	1	1	1	95	0	95	0
1	75	2.3	2	1	0	1	2	1	5	1	1	1	1	NA	1	0	0	94	0	94	0
1	42	2	1	1	0	NA	2	1	6	1	1	1	1	0	1	1	0	70	0	70	0
1	59	3.5	2	1	0	0	NA	1	3	1	0	0	0	NA	1	0	0	94	0	94	0
1	33	2	1	1	0	1	2	1	3	1	1	1	1	0	1	1	0	94	0	94	0
1	27	NA	NA	2	0	NA	NA	2	3	3	1	1	1	1	1	1	0	94	0	94	0
1	31	3.7	2	1	0	1	2	2	8	2	0	0	0	0	1	1	1	94	0	94	0
1	72	2	1	1	0	0	2	1	4	2	1	1	1	0	1	1	0	94	0	94	0
1	44	3	2	1	0	0	2	1	4	1	1	1	1	0	1	1	0	94	0	94	0
1	34	2.5	2	1	0	NA	2	1	4	1	1	1	1	0	1	1	1	94	0	94	0
1	70	0.8	1	1	0	0	2	1	4	1	1	1	1	0	1	1	1	94	0	94	0
1	52	1	1	1	0	0	2	1	3	1	1	1	1	NA	1	1	0	94	0	94	0
1	55	2	1	1	0	NA	NA	5	5	5	1	1	1	1	1	1	1	93	0	93	0
1	50	4	2	1	0	1	2	2	6	2	1	1	1	1	1	1	1	93	0	93	0
1	46	1.8	1	2	0	0	3	1	7	1	1	1	1	0	1	1	1	93	0	93	0
1	61	2	1	1	0	1	2	1	4	1	1	1	1	0	1	1	0	93	0	93	0
1	47	2	1	1	0	0	2	1	4	1	1	1	1	0	1	1	0	57	0	57	0
1	50	2	1	1	0	NA	2	1	1	1	1	1	1	0	1	1	1	93	0	93	0
1	51	2.5	2	1	0	1	2	1	2	1	1	1	1	0	1	1	0	93	0	93	0
1	54	2.6	2	1	0	0	3	1	6	1	1	1	1	1	1	1	0	92	0	92	0
1	44	2.5	2	1	0	0	2	4	6	7	1	1	1	0	1	1	1	92	0	92	0
1	44	1	1	1	0	0	NA	1	8	1	1	1	1	0	1	1	0	92	0	92	0
1	37	1.5	1	1	0	NA	2	2	2	23	1	1	1	NA	1	1	1	92	0	92	0
1	64	2	1	1	0	0	3	1	2	1	1	1	1	0	1	1	0	91	0	91	0
1	46	1.6	1	2	0	0	2	1	5	2	1	1	1	0	1	NA	0	68	0	68	0
1	54	1.8	1	1	0	0	3	1	2	4	1	0	1	1	1	1	1	91	0	91	0
1	44	2.6	2	1	0	NA	2	1	3	1	1	1	1	0	1	1	0	91	0	91	0
1	42	NA	NA	1	0	NA	NA	1	4	1	NA	NA	NA	NA	NA	1	0	91	0	91	0
1	63	4	2	1	0	NA	3	1	7	1	0	1	0	1	1	1	0	91	0	91	0
1	60	1.6	1	1	0	0	2	1	4	1	1	1	1	0	1	1	0	91	0	91	0
1	48	0.6	1	2	0	0	3	1	4	1	1	0	1	1	1	1	1	91	0	91	0
1	47	2	1	1	0	0	NA	2	4	5	1	1	1	NA	1	1	0	91	0	91	0
1	45	2	1	2	0	NA	2	1	4	1	1	1	1	0	1	1	1	90	0	90	0
1	50	1.2	1	1	0	0	NA	1	4	1	1	0	1	1	1	1	1	91	0	91	0
1	33	2	1	1	0	1	NA	1	5	1	1	1	1	0	1	1	1	90	0	90	0
1	51	2.5	2	1	0	NA	2	4	6	7	1	1	1	0	1	1	1	90	0	90	0
1	46	3.5	1	1	0	0	NA	3	5	1	1	1	1	0	1	1	1	90	0	90	0
1	43	0.8	1	2	0	0	NA	2	4	2	1	1	1	0	1	1	1	90	0	90	0
1	62	1.2	1	1	0	1	2	1	6	1	1	1	1	0	1	1	1	90	0	90	0
1	40	1.2	1	2	0	0	3	1	2	1	1	1	1	1	1	1	1	90	0	90	0
1	51	1.2	1	2	0	0	3	2	3	2	1	1	1	1	1	1	1	89	0	89	0
1	76	1.5	1	1	0	1	2	2	4	3	1	1	1	0	1	1	1	89	0	89	0
1	48	NA	NA	1	0	NA	2	4	7	7	0	0	0	1	1	1	0	43	0	43	0
1	66	2	1	1	1	0	NA	3	6	2	1	1	1	0	0	1	0	89	0	89	0
1	47	2.5	2	1	0	1	2	1	2	1	1	1	1	NA	1	1	NA	89	0	89	0
1	53	3.5	2	1	0	0	NA	5	5	24	1	1	1	0	1	1	1	89	0	65	0
1	30	NA	NA	1	0	NA	NA	1	2	1	1	1	1	0	1	1	0	89	0	89	0
1	47	3	2	1	0	0	3	2	2	8	1	1	1	1	1	1	0	42	0	42	0
1	51	1.6	1	1	0	1	NA	1	4	4	1	1	1	1	1	1	0	89	0	89	0
1	35	NA	NA	1	0	NA	NA	2	4	2	1	1	1	0	1	1	1	88	0	88	0
1	57	1.2	1	1	0	0	3	1	4	1	0	0	0	1	1	1	1	88	0	88	0
1	46	2.5	2	1	0	1	3	1	3	1	1	1	1	0	1	1	1	88	0	88	0
1	60	2	1	1	0	1	3	3	5	3	1	1	1	0	1	1	0	88	0	88	0
1	57	1.5	1	2	0	0	2	1	3	1	1	1	1	0	1	1	1	88	0	88	0
1	49	2.3	2	1	0	0	2	2	2	NA	NA	NA	NA	NA	NA	1	1	88	0	88	0
1	34	3	2	1	0	1	3	1	7	1	1	1	1	1	1	1	1	88	0	88	0
1	43	3	2	2	0	0	NA	2	8	2	1	1	1	0	1	1	1	88	0	9	0
1	27	2.5	2	1	0	1	3	4	6	1	0	0	0	1	1	NA	NA	45	0	45	0
1	39	2.5	2	1	0	NA	2	5	7	5	0	0	0	1	1	1	1	87	0	87	0
1	65	2	1	1	0	0	2	1	4	1	1	1	1	0	1	0	0	87	0	87	0
1	42	1	1	2	0	0	2	2	7	2	1	1	1	0	1	1	1	87	0	87	0
1	46	1	1	2	0	0	2	1	2	2	1	1	1	0	1	1	1	87	0	87	0
1	63	2.6	2	1	0	0	2	2	2	2	1	1	1	0	1	1	0	42	0	42	0
1	38	2.6	2	2	0	0	3	1	4	1	1	1	1	0	1	1	1	86	0	86	0
1	55	4	2	1	0	0	3	1	6	1	0	0	0	0	1	1	1	67	1	67	1
1	43	1	1	1	0	0	3	1	4	2	0	0	0	0	1	1	0	86	0	86	0
1	41	1	1	2	0	0	2	1	2	1	1	1	1	0	1	1	0	87	0	87	0
1	76	3	2	1	0	0	NA	1	5	1	1	1	1	0	1	0	0	86	0	86	0
1	58	2	1	1	0	0	NA	2	4	3	1	1	1	0	1	1	1	86	0	86	0
1	55	1.2	1	1	0	0	3	2	8	2	0	0	0	1	1	1	0	86	0	86	0
1	66	1.6	1	1	0	NA	NA	1	4	1	1	1	1	0	1	0	0	86	1	86	1
1	71	1.5	1	1	0	0	2	1	4	1	1	1	1	0	1	0	0	85	0	85	0
1	56	1.2	1	2	0	0	NA	2	2	3	1	1	1	0	1	1	1	86	0	86	0
1	54	1	1	1	0	0	2	1	4	2	1	1	1	0	1	1	1	86	0	86	0
1	52	NA	NA	1	0	NA	NA	1	3	1	1	0	1	0	1	0	0	85	0	85	0
1	47	2.5	2	1	0	0	2	1	2	2	1	1	1	NA	1	1	1	85	0	85	0
1	58	2.5	2	1	0	0	2	1	4	1	1	0	1	1	1	1	1	86	0	86	0
1	51	1.5	1	2	0	0	2	1	3	1	1	1	1	1	1	1	1	85	0	85	0
1	53	2	1	1	0	0	2	3	4	1	1	1	1	0	1	1	1	85	0	85	0
1	43	1.5	1	2	0	0	3	1	2	1	1	1	1	0	1	1	1	85	0	85	0
1	50	2.5	2	2	0	0	2	2	2	8	1	1	1	0	1	1	1	85	0	85	0
1	30	0.8	1	2	0	0	2	2	5	4	1	1	1	0	1	1	1	85	0	85	0
1	64	4	2	1	0	1	3	1	3	1	0	0	0	0	1	1	0	31	1	30	1
1	35	NA	NA	1	0	NA	NA	1	5	0	0	0	0	0	1	1	0	85	0	85	0
1	52	2	1	1	0	0	2	2	4	2	1	1	1	0	1	1	0	84	0	84	0
1	42	NA	NA	1	0	NA	NA	2	5	2	1	1	1	1	1	1	1	85	0	85	0
1	51	2	1	1	0	0	3	3	4	1	1	1	1	1	1	1	1	84	0	84	0
1	62	3.3	2	1	0	0	2	1	3	0	1	1	1	1	1	1	1	84	0	84	0
1	53	2.5	2	1	0	0	2	2	4	2	1	1	1	0	0	1	0	84	0	84	0
1	47	3.5	2	1	0	1	2	1	4	2	1	1	1	1	1	1	1	84	0	84	0
1	46	1.5	1	1	0	0	3	1	2	1	1	1	1	0	1	1	1	83	0	83	0
1	32	NA	NA	1	0	1	2	6	7	6	1	1	1	0	1	1	1	84	0	84	0
1	69	2	1	1	0	0	2	1	2	4	1	1	1	0	1	1	0	83	0	83	0
1	32	1	1	2	0	0	2	1	3	1	1	1	1	0	1	1	1	83	0	83	0
1	54	3	2	1	0	0	3	2	4	3	1	1	1	1	1	0	0	40	0	40	0
1	65	2.5	2	2	0	1	2	3	3	8	1	1	1	0	1	1	1	35	1	35	1
1	61	2	1	1	0	0	2	1	4	1	1	1	1	0	1	1	0	40	0	40	0
1	57	1.5	1	1	0	0	2	1	3	1	1	1	1	0	1	1	0	83	0	83	0
1	45	NA	NA	1	0	NA	2	1	3	1	1	1	1	NA	1	1	1	83	0	83	0
1	45	1.5	1	1	0	0	NA	1	6	1	0	0	0	1	1	1	1	59	1	59	1
1	57	1.4	1	2	0	0	2	1	5	1	1	1	1	NA	1	1	1	83	0	83	0
1	46	1.5	1	1	0	0	3	2	4	2	1	1	1	0	1	1	0	83	0	83	0
1	63	2.5	2	2	0	0	2	2	2	2	1	1	1	0	1	1	1	83	0	83	0
1	53	1.5	1	1	0	0	2	1	3	1	1	1	1	1	1	1	0	82	0	82	0
1	66	1.7	1	2	0	0	2	2	3	2	1	1	1	0	1	1	1	82	0	82	0
1	50	NA	NA	1	0	NA	NA	1	2	2	1	1	1	0	0	1	1	82	0	82	0
1	64	3	2	1	0	0	2	1	3	1	1	1	1	NA	1	0	0	82	0	82	0
1	39	2	1	1	0	1	2	1	3	1	1	1	1	0	1	1	0	82	0	82	0
1	50	2.5	2	1	0	0	2	1	3	2	1	1	1	1	1	1	1	82	0	82	0
1	72	3	2	1	0	0	2	1	4	1	1	1	1	0	1	0	0	35	1	35	1
1	67	3	2	1	0	0	2	1	3	2	1	1	1	0	1	1	1	82	0	82	0
1	78	2.5	2	2	0	0	2	2	3	2	1	1	1	NA	1	0	0	82	0	82	0
1	44	2.5	2	1	0	0	2	1	5	1	1	1	1	NA	1	1	0	81	0	81	0
1	65	2.2	2	2	0	0	3	3	5	3	0	0	0	0	1	1	1	24	1	24	1
1	69	1	1	1	0	0	2	1	4	1	1	1	1	NA	1	0	0	81	0	81	0
1	44	2.5	2	1	0	0	2	1	5	1	1	1	1	NA	1	1	0	81	0	81	0
1	54	2	1	1	0	0	2	1	2	5	1	1	1	0	1	1	1	81	0	81	0
1	62	1.5	1	1	0	0	2	1	3	1	1	1	1	0	1	1	0	81	0	81	0
1	39	NA	NA	1	0	NA	2	1	3	1	1	1	1	0	0	1	0	81	0	81	0
1	51	2	1	1	0	1	2	1	1	1	1	1	1	0	1	1	0	46	0	46	0
1	56	2	1	1	0	1	3	2	3	2	1	1	1	1	1	1	1	80	0	80	0
1	55	NA	1	2	0	0	3	2	4	1	1	1	1	0	1	1	1	80	0	80	0
1	62	2	1	1	0	0	2	1	4	1	1	1	1	0	1	1	1	80	0	80	0
1	58	2	1	1	0	0	2	1	2	2	1	1	1	0	1	1	0	80	0	80	0
1	48	1	1	1	0	0	1	3	7	5	1	1	1	0	1	1	1	81	0	81	0
1	55	1.8	1	2	0	0	3	2	4	2	1	1	1	0	1	1	1	80	0	80	0
1	46	3	2	1	0	0	1	1	2	2	1	1	1	0	1	1	1	80	0	80	0
1	33	1.2	1	1	0	0	2	1	4	1	1	1	1	0	1	1	0	78	1	32	1
1	64	1.5	1	1	0	0	3	1	4	2	1	0	1	1	1	1	1	80	0	80	0
1	47	2.5	2	1	0	0	3	3	5	3	0	0	0	0	1	1	NA	80	0	80	0
1	64	2	1	1	1	0	2	1	3	1	1	1	1	1	1	1	1	21	0	21	0
1	50	2.5	2	1	0	NA	NA	1	3	1	1	1	1	0	1	1	1	80	0	44	0
1	42	1.2	1	2	0	0	2	2	4	2	1	1	1	0	1	1	1	80	0	80	0
1	49	2.5	2	2	0	0	2	1	2	1	1	1	1	0	1	1	1	80	0	80	0
1	44	NA	NA	1	0	NA	NA	1	3	2	1	1	1	0	1	1	1	80	0	80	0
1	54	2	1	1	0	0	3	1	5	1	1	1	1	0	1	1	0	80	0	80	0
1	36	5	2	1	0	0	2	2	5	2	1	1	1	0	1	1	0	79	0	79	0
1	36	2	1	2	0	0	3	2	4	4	1	1	1	0	1	1	1	79	0	79	0
1	38	2.5	2	1	0	0	2	2	2	2	1	1	1	0	0	1	0	79	0	79	0
1	46	0.7	1	1	0	0	1	1	5	1	1	1	1	0	1	1	1	79	0	79	0
1	37	2.2	2	1	0	0	2	1	5	1	1	1	1	1	1	1	1	79	0	67	0
1	67	1.2	1	1	0	0	1	1	5	1	1	1	1	0	1	0	0	80	0	80	0
1	61	2	1	2	0	0	2	2	8	2	1	1	1	NA	1	1	1	50	0	50	0
1	47	1.5	1	1	0	0	2	2	2	3	1	1	1	1	1	1	1	78	0	66	0
1	36	1	1	1	0	0	NA	3	6	10	1	1	1	0	1	1	1	78	0	78	0
1	27	NA	NA	2	0	NA	3	1	1	1	0	0	0	0	1	1	1	78	0	78	0
1	70	3.5	2	1	0	0	2	1	3	1	1	1	1	NA	1	0	0	78	1	78	1
1	38	2	1	1	0	1	3	1	3	1	0	0	0	1	1	1	1	78	0	78	0
1	47	2.5	2	1	0	1	2	2	4	2	1	1	1	0	1	1	1	77	0	77	0
1	40	2	1	1	0	0	2	1	3	1	1	1	1	0	1	1	0	78	0	78	0
1	45	1	1	1	0	0	2	2	9	2	0	0	0	0	1	1	1	77	0	77	0
1	45	NA	NA	1	0	NA	2	2	2	3	1	1	1	0	1	1	1	77	0	77	0
1	46	3.5	2	1	0	0	2	1	4	2	1	1	1	0	1	1	1	58	0	10	0
1	59	2.8	2	1	0	0	2	3	6	4	1	1	1	0	1	1	0	58	0	58	0
1	48	NA	NA	1	0	NA	2	1	6	1	1	0	1	0	1	1	0	76	0	76	0
1	46	4	2	1	0	0	2	3	5	3	1	1	1	1	1	1	1	77	0	77	0
1	50	2.8	2	1	1	0	2	1	3	1	1	1	1	0	1	1	0	76	0	76	0
1	34	NA	1	1	0	NA	NA	1	3	1	1	1	1	0	1	1	1	76	0	76	0
1	40	2.5	2	1	0	0	2	1	3	1	NA	1	1	0	1	1	1	76	0	76	0
1	49	4	2	1	0	0	2	1	4	1	1	1	1	1	1	1	1	76	0	76	0
1	28	NA	NA	1	0	NA	2	1	4	2	1	1	1	0	1	1	1	76	0	76	0
1	46	3	2	1	0	1	2	4	4	14	1	1	1	NA	1	1	1	77	0	77	0
1	60	3	2	1	0	0	2	1	4	1	1	1	1	NA	1	1	1	76	0	76	0
1	37	NA	NA	1	0	0	3	3	4	6	1	1	1	0	1	1	1	76	0	76	0
1	68	1.5	1	1	0	0	2	1	3	1	1	1	1	0	1	1	0	76	0	76	0
1	69	1.5	1	1	0	0	3	1	6	1	1	1	1	0	1	1	0	76	0	76	0
1	38	2	1	1	0	0	2	1	4	1	1	1	1	0	1	1	1	76	0	76	0
1	42	1.5	1	2	0	0	3	1	2	1	1	1	1	0	1	1	1	75	0	75	0
1	49	3.5	2	1	0	0	2	1	5	1	1	1	1	0	1	1	0	75	0	75	0
1	51	1.5	1	1	0	0	2	1	4	1	1	1	1	0	1	1	0	79	0	79	0
1	60	2.8	2	1	0	0	2	2	7	3	1	1	1	1	1	1	1	75	0	75	0
1	59	1.5	1	1	0	0	2	1	4	1	1	1	1	0	1	1	0	75	0	75	0
1	55	1.8	1	1	0	0	2	1	4	1	0	0	0	1	1	0	0	75	0	75	0
1	47	2	1	1	0	0	2	1	5	1	1	1	1	0	1	1	0	75	0	75	0
1	36	2.3	1	1	0	0	3	2	3	2	1	0	1	1	1	1	1	75	0	75	0
1	58	NA	NA	1	0	NA	NA	2	4	2	1	1	1	1	1	1	1	75	0	75	0
1	41	1.5	1	1	0	0	2	1	6	1	1	1	1	0	1	1	0	74	0	74	0
1	73	2	1	1	0	1	2	1	3	1	1	1	1	0	1	0	0	74	0	74	0
1	52	1.2	1	2	0	0	2	2	2	2	1	1	1	0	1	1	0	24	0	24	0
1	62	2	1	1	0	0	2	2	3	2	1	1	1	0	1	1	1	73	1	61	1
1	45	3	2	1	0	1	2	4	4	10	1	1	1	0	1	1	1	74	0	74	0
1	55	1.5	1	1	0	0	2	1	4	1	0	0	0	1	1	1	0	74	0	74	0
1	75	1.5	1	1	0	0	1	1	3	1	1	1	1	0	1	NA	NA	55	0	55	0
1	54	NA	NA	1	0	1	NA	1	2	1	1	1	1	0	1	1	1	73	0	73	0
1	66	1.8	NA	2	0	0	2	1	5	1	1	1	1	NA	0	1	0	73	0	73	0
1	55	1.5	1	1	0	1	2	1	3	2	1	1	1	0	1	1	0	73	0	73	0
1	64	3	2	1	0	0	2	1	5	1	1	1	1	0	1	1	1	73	0	73	0
1	65	3	2	1	0	0	2	1	4	1	1	1	1	0	1	1	0	73	0	73	0
1	60	2	1	1	0	1	3	1	3	1	1	1	1	0	1	1	0	74	0	74	0
1	83	2	1	1	0	0	2	1	3	1	1	1	1	NA	1	0	0	73	0	73	0
1	43	NA	NA	2	0	NA	NA	1	3	1	0	1	0	0	1	1	1	73	0	73	0
1	59	3.5	2	1	0	0	2	2	6	2	1	1	1	0	1	1	1	74	0	74	0
1	40	1.2	1	1	0	0	2	1	3	1	1	1	1	0	1	1	1	73	0	73	0
1	69	NA	NA	1	1	0	2	2	5	5	1	1	1	NA	1	1	1	73	0	73	0
1	70	3	2	1	0	0	2	2	3	2	1	1	1	NA	1	0	0	73	0	73	0
1	35	1.5	1	1	0	0	2	1	3	1	1	1	1	NA	1	1	0	73	0	73	0
1	72	1.5	1	1	0	0	2	3	4	9	1	1	1	NA	1	1	1	72	0	72	0
1	55	1.8	1	1	0	0	2	2	5	2	1	1	1	0	1	1	1	54	0	54	0
1	34	1.5	1	2	0	0	2	1	3	1	1	1	1	NA	1	1	1	72	0	72	0
1	37	2.5	2	1	0	1	3	1	4	1	1	1	1	NA	1	1	1	74	0	62	0
1	45	5	2	1	0	0	2	2	4	3	1	1	1	0	1	1	1	72	0	72	0
1	50	1.8	1	2	0	0	2	1	2	1	1	1	1	NA	1	1	1	72	0	72	0
1	54	2.5	2	1	0	0	2	4	5	11	1	1	1	NA	1	1	1	78	0	78	0
1	53	1.5	1	2	0	0	2	2	4	2	1	1	1	0	1	1	1	72	0	72	0
1	33	2	1	2	0	0	2	1	2	1	1	1	1	0	1	1	1	72	0	72	0
1	65	3	2	1	0	0	3	2	3	7	1	1	1	0	1	1	1	72	0	72	0
1	65	1	1	1	0	0	2	1	3	2	1	1	1	0	1	1	1	71	0	71	0
1	31	NA	NA	2	0	0	2	3	5	3	1	0	1	1	1	1	1	28	0	16	0
1	45	1	1	1	0	0	1	2	2	2	1	1	1	0	1	1	1	71	0	71	0
1	46	1.5	1	1	0	0	1	2	3	2	1	1	1	0	1	1	1	72	0	72	0
1	52	1.5	1	1	0	0	2	3	5	3	1	1	1	0	1	1	1	71	0	71	0
1	49	2	1	1	0	0	2	1	5	1	1	1	1	NA	1	1	0	72	0	72	0
1	66	1	1	1	0	0	3	1	2	1	1	1	1	0	1	1	0	71	0	71	0
1	57	1.8	1	1	0	0	3	2	3	3	1	1	1	NA	1	1	1	71	0	71	0
1	40	2.6	2	1	0	0	3	2	3	2	1	1	1	NA	1	1	1	71	0	71	0
1	71	1.6	1	1	1	1	3	3	4	3	1	1	1	1	1	0	0	71	0	71	0
1	65	2	1	2	0	0	3	1	4	1	0	0	0	0	1	0	0	71	0	11	0
1	63	3	2	1	0	0	2	2	2	2	1	1	1	0	1	1	0	70	0	70	0
1	38	0.4	1	1	0	0	NA	2	4	3	1	1	1	0	1	1	1	69	0	69	0
1	47	3	2	1	0	0	2	1	4	1	0	0	0	1	1	1	0	70	0	70	0
1	65	0.6	1	1	0	NA	NA	1	3	1	1	1	1	0	1	1	0	69	0	69	0
1	64	2	1	1	0	0	2	2	2	2	1	1	1	0	1	1	1	69	0	69	0
1	47	1.5	1	1	0	0	2	1	4	1	1	1	1	0	1	1	0	69	0	69	0
1	49	2	1	1	0	0	2	1	3	2	1	1	1	1	1	1	0	69	0	69	0
1	64	5	2	1	0	0	2	3	3	3	1	1	1	0	1	1	0	69	0	69	0
1	61	2	1	1	0	1	2	1	4	1	1	1	1	0	1	0	0	69	0	69	0
1	36	NA	NA	2	0	1	2	3	4	17	0	0	0	1	1	1	1	69	0	45	0
1	40	4	2	1	0	0	NA	1	3	2	1	1	1	0	1	1	1	69	0	69	0
1	54	3	2	1	0	0	2	1	5	1	1	1	1	0	1	1	0	69	0	69	0
1	38	1.5	1	2	0	0	2	1	5	2	1	1	1	0	1	1	1	69	0	69	0
1	67	2.5	2	1	0	0	2	1	6	1	1	0	1	0	1	1	0	68	0	68	0
1	54	1	1	1	0	0	2	1	4	1	1	1	1	1	1	1	0	68	0	68	0
1	46	2	1	1	0	1	2	1	2	1	1	1	1	0	1	1	0	68	0	32	0
1	63	2	1	1	0	1	2	2	2	2	1	1	1	0	1	1	1	68	0	68	0
1	38	1.5	1	2	0	0	3	2	3	4	1	1	1	0	1	1	1	67	0	67	0
1	48	1.5	1	2	0	0	2	3	4	7	1	1	1	0	1	1	1	68	0	68	0
1	42	2	1	1	0	0	2	1	3	1	1	1	1	0	1	1	0	68	0	68	0
1	36	2.2	2	2	0	0	3	2	3	2	0	0	0	1	1	1	1	68	0	68	0
1	58	3.5	2	1	0	0	2	1	2	1	1	1	NA	0	1	1	1	67	0	67	0
1	48	2	1	1	0	1	2	1	5	1	1	1	1	0	1	1	0	67	0	67	0
1	63	2	1	1	1	1	2	2	4	2	1	1	1	0	1	0	0	68	0	68	0
1	49	3	2	1	0	0	2	3	4	3	1	1	1	NA	1	1	1	67	0	67	0
1	46	1.5	1	1	0	1	2	3	3	6	1	1	1	NA	1	1	1	67	0	67	0
1	64	NA	NA	2	0	NA	NA	2	5	2	0	0	0	1	1	1	1	67	0	67	0
1	35	2.5	2	1	0	0	2	2	3	5	1	1	1	0	1	1	0	55	0	55	0
1	61	3	2	1	0	0	2	3	7	8	1	1	1	0	1	1	1	67	0	67	0
1	40	3	2	1	0	1	3	1	6	2	0	0	0	1	1	1	1	66	0	66	0
1	42	4	2	1	0	0	NA	2	6	2	1	1	1	0	1	1	1	66	0	66	0
1	44	1.5	1	1	0	NA	NA	1	2	1	1	1	1	0	1	1	1	66	0	66	0
1	49	1	1	1	0	1	2	2	3	2	1	1	1	0	1	1	1	66	0	66	0
1	48	3	2	1	0	0	2	1	2	2	1	1	1	0	1	1	1	65	0	65	0
1	68	1.5	1	1	0	0	2	1	2	1	1	1	1	0	1	1	0	65	0	65	0
1	35	2	1	1	0	0	3	1	3	2	1	1	1	NA	1	1	1	66	0	66	0
1	53	3	2	1	0	0	2	1	3	1	1	1	1	0	1	1	1	65	0	65	0
1	43	NA	NA	1	0	NA	NA	2	3	3	1	1	1	1	1	1	1	44	0	44	0
1	44	1.5	1	1	0	1	2	2	4	2	1	1	1	0	1	1	1	65	0	65	0
1	64	3	2	1	0	0	2	2	4	2	1	1	1	0	1	1	1	65	0	65	0
1	49	1.5	1	2	0	0	2	1	4	1	1	1	1	0	0	1	1	65	0	65	0
1	77	1.5	1	1	0	0	2	1	3	1	1	1	1	0	1	0	0	65	0	65	0
1	62	2	1	1	0	1	3	3	4	3	1	0	1	1	1	1	1	64	0	64	0
1	51	NA	NA	2	0	NA	2	1	5	1	1	1	1	1	1	1	1	65	1	41	1
1	71	1.5	1	1	0	0	2	1	3	1	1	1	1	0	0	1	0	64	0	64	0
1	32	NA	NA	2	0	NA	2	1	5	1	1	1	1	1	1	1	1	65	0	65	0
1	60	1	1	1	0	0	2	1	3	1	1	1	1	0	1	0	0	65	0	65	0
1	69	2.5	2	1	0	0	2	1	3	1	1	1	1	0	1	0	0	64	0	64	0
1	55	3.5	2	1	0	0	3	1	6	1	0	0	0	0	1	1	0	65	0	65	0
1	56	2.5	2	1	0	0	2	1	2	1	1	1	1	0	1	1	1	64	0	64	0
1	41	1.5	1	1	0	0	2	2	3	3	1	1	1	0	1	1	1	65	0	65	0
1	48	5	2	1	0	0	NA	4	4	12	1	1	1	0	1	1	1	64	0	64	0
1	46	3	2	2	0	0	3	1	1	1	1	1	1	0	1	1	0	64	0	64	0
1	59	2	1	1	0	0	2	2	5	2	1	1	1	1	1	1	1	64	0	64	0
1	62	1.2	1	2	0	0	2	1	4	3	1	0	1	0	1	1	1	64	0	64	0
1	43	2	1	1	0	1	2	2	3	2	1	1	1	0	1	1	1	64	0	64	0
1	33	1	1	2	0	0	2	2	4	2	1	1	1	0	1	1	0	64	0	64	0
1	37	NA	NA	1	0	0	2	3	4	15	1	1	1	0	1	1	1	63	0	63	0
1	56	NA	NA	1	0	NA	NA	1	5	1	1	1	1	0	1	1	0	64	0	64	0
1	41	3	2	1	0	0	3	1	3	1	0	0	0	1	1	1	1	64	0	64	0
1	56	3.5	2	1	0	0	3	1	3	1	0	0	0	1	1	1	1	64	0	64	0
1	71	1.2	1	1	1	1	2	3	7	9	1	1	1	0	1	1	1	63	0	63	0
1	56	3	2	1	0	1	2	1	5	1	1	1	1	0	1	1	1	63	0	63	0
1	48	NA	NA	1	0	0	2	1	5	1	NA	NA	NA	NA	NA	1	1	63	0	63	0
1	37	2.7	2	1	0	1	2	5	5	13	1	0	1	1	1	1	1	62	0	62	0
1	60	2.8	2	1	0	0	3	1	4	1	0	0	0	NA	1	1	1	62	0	62	0
1	54	1.5	1	1	0	0	2	1	4	1	1	1	1	0	1	1	1	62	0	62	0
1	61	3	2	2	0	0	2	1	2	2	1	1	1	0	1	1	1	63	0	63	0
1	62	1.5	1	1	0	0	2	1	1	1	1	1	1	0	1	1	0	63	0	63	0
1	47	2.2	2	1	0	0	2	1	2	1	1	1	1	0	1	1	1	63	0	63	0
1	65	2	1	1	0	0	3	1	3	1	1	1	1	1	1	1	0	14	0	14	0
1	37	NA	NA	2	0	0	2	2	6	5	0	0	0	1	1	1	1	62	0	62	0
1	50	NA	NA	1	0	NA	NA	1	4	1	1	1	1	0	1	1	0	62	0	62	0
1	54	2	1	2	0	NA	NA	1	5	1	1	0	1	0	1	1	1	38	1	38	1
1	70	2	1	2	0	0	2	2	2	2	1	1	1	0	1	1	1	50	1	50	1
1	57	NA	NA	1	0	NA	NA	3	3	12	1	1	1	0	1	1	1	62	0	62	0
1	48	NA	NA	1	0	NA	NA	1	3	1	0	1	0	0	NA	1	0	62	0	62	0
1	50	1.7	1	2	0	0	2	2	4	2	1	1	1	0	1	1	1	61	0	61	0
1	40	NA	NA	1	0	NA	3	1	2	1	1	1	1	0	1	1	0	62	0	62	0
1	65	2	1	1	0	0	3	1	4	1	1	1	1	0	1	1	1	62	0	62	0
1	69	3	2	1	0	0	2	1	3	1	1	1	1	0	1	1	0	62	0	62	0
1	34	NA	NA	1	0	NA	2	2	4	2	0	0	0	1	1	1	1	61	0	61	0
1	59	3	2	1	0	0	2	2	3	12	1	0	1	0	1	1	1	61	0	61	0
1	59	1.5	1	2	0	0	2	1	4	1	1	1	1	0	1	1	0	62	0	62	0
1	37	1	1	1	0	0	2	2	4	2	1	1	1	0	1	1	1	61	0	61	0
1	68	2	1	1	0	0	2	1	4	1	1	1	1	0	1	1	0	62	0	62	0
1	41	2	1	1	0	0	2	2	2	18	1	1	1	0	1	1	1	61	0	61	0
1	61	NA	NA	1	0	NA	NA	3	3	8	1	1	1	0	1	1	1	61	0	61	0
1	62	4	2	1	0	0	2	1	3	2	1	1	1	0	1	1	0	61	0	61	0
1	47	3	2	1	0	0	3	1	5	2	0	0	0	1	1	1	1	61	0	61	0
1	51	2	NA	1	0	0	2	1	3	1	1	1	1	0	1	1	1	60	0	60	0
1	56	2	1	1	0	0	2	1	2	1	1	1	1	0	1	0	0	61	0	61	0
1	42	2	1	2	0	0	2	1	5	1	1	1	1	0	1	1	1	61	0	61	0
1	53	2	1	1	0	0	3	1	2	1	1	1	1	0	1	1	1	60	0	60	0
1	61	2	1	1	0	0	2	1	2	2	1	1	1	NA	1	1	NA	60	0	60	0
1	74	1.5	1	1	0	0	2	1	5	1	1	1	1	0	1	1	0	60	0	60	0
1	46	0.8	1	1	0	0	2	1	1	1	1	1	1	0	1	1	1	60	0	60	0
1	47	1.4	NA	1	0	0	2	1	4	1	1	1	1	0	1	1	1	60	0	60	0
1	50	1	1	2	0	0	3	1	3	1	1	1	1	0	1	1	1	59	0	59	0
1	38	3	2	1	0	0	2	1	3	2	1	1	1	1	1	1	1	60	0	60	0
1	48	2	1	1	0	0	2	1	3	1	1	1	1	0	1	1	0	59	0	59	0
1	54	2.5	2	1	0	0	2	2	4	3	1	1	1	1	1	1	0	59	0	59	0
1	71	1.5	1	2	0	1	2	1	2	1	1	1	1	0	1	0	1	59	0	59	0
1	65	2.2	2	2	0	0	2	2	3	5	1	1	1	0	1	1	1	59	0	59	0
1	47	1	1	1	0	0	2	1	2	1	1	1	1	0	0	0	0	59	0	59	0
1	54	2	1	1	0	1	3	1	4	1	1	0	1	0	1	1	1	59	0	59	0
1	55	2	1	1	0	0	3	2	3	6	1	1	1	0	1	1	1	59	0	59	0
1	43	4.5	2	1	0	0	3	1	2	1	0	0	0	0	1	1	1	59	0	59	0
1	63	3	2	1	0	0	3	1	4	1	0	0	0	0	1	1	1	59	0	59	0
1	29	2	1	2	0	0	3	1	4	1	1	1	1	0	1	1	1	59	0	59	0
1	52	2.5	2	1	0	0	3	2	4	2	1	0	1	1	1	NA	NA	59	0	59	0
1	63	2.8	2	1	0	0	3	1	3	1	0	1	0	0	1	1	0	59	0	59	0
1	41	2	1	1	0	0	2	2	3	2	1	1	1	0	1	1	1	59	0	59	0
1	63	2	1	1	0	1	2	1	3	9	1	0	1	1	1	1	1	58	0	58	0
1	47	NA	2	1	0	NA	NA	1	5	1	1	1	1	0	1	0	0	58	0	58	0
1	56	2	1	1	0	1	2	1	7	1	1	1	1	1	1	1	0	59	0	59	0
1	41	1.5	1	1	0	0	3	1	5	1	0	0	0	1	1	1	0	58	0	58	0
1	71	2	1	1	0	0	2	1	5	1	1	1	1	0	1	1	0	58	0	58	0
1	49	2.5	2	1	0	0	2	2	5	3	1	1	1	0	1	1	1	58	0	58	0
1	49	1.5	1	1	0	1	2	1	4	2	1	1	1	0	1	1	1	58	0	58	0
1	52	2.5	2	1	0	0	2	3	3	5	1	1	1	0	1	1	1	59	0	59	0
1	56	2.5	2	1	0	0	2	2	3	2	1	1	1	0	1	1	1	58	0	58	0
1	46	3	2	1	0	0	NA	1	2	1	1	1	1	0	1	1	0	58	0	58	0
1	45	3	2	1	0	0	2	1	2	2	1	1	1	0	1	1	1	57	0	57	0
1	53	2.5	2	1	0	0	2	2	4	2	1	1	1	0	1	1	1	57	0	57	0
1	63	1	1	1	0	0	3	1	4	1	1	1	1	0	1	1	0	57	0	57	0
1	51	3	2	1	0	0	NA	1	2	2	1	1	1	0	0	0	0	57	0	57	0
1	36	1.5	1	1	0	1	2	2	4	2	1	1	1	NA	1	1	1	57	0	57	0
1	58	3	2	1	0	0	2	2	3	2	1	1	1	0	1	1	1	56	0	56	0
1	38	1.5	1	1	0	0	2	2	4	2	1	1	1	0	1	1	1	57	0	57	0
1	66	0.6	1	1	0	0	2	1	4	1	1	1	1	1	1	1	1	57	0	57	0
1	32	2	2	1	0	1	2	2	3	5	1	1	1	0	1	1	1	56	0	56	0
1	57	1.5	1	1	0	0	2	1	4	1	1	1	1	0	1	1	0	56	0	56	0
1	71	1	1	1	0	0	2	2	3	10	1	1	1	0	1	1	1	56	0	56	0
1	47	2	1	1	0	1	2	5	5	10	1	1	1	0	1	1	1	56	0	56	0
1	55	1.8	1	2	0	0	3	3	5	3	1	1	1	0	1	1	1	56	0	56	0
1	57	3	2	2	0	0	3	3	6	3	1	0	1	1	1	1	1	56	0	56	0
1	60	1.5	1	1	0	0	NA	1	4	1	1	1	1	0	1	1	0	55	0	55	0
1	36	1.5	1	1	0	0	2	2	4	2	1	1	1	0	1	1	1	55	0	55	0
1	53	2	1	1	0	0	2	1	6	1	1	1	1	NA	1	1	0	56	0	56	0
1	60	2	1	1	0	0	2	1	5	1	1	1	1	NA	1	1	1	55	0	55	0
1	58	2.2	2	1	0	1	2	2	3	2	1	1	1	NA	1	1	1	55	0	55	0
1	44	4	2	1	0	0	NA	1	4	1	1	1	1	0	1	1	0	21	0	21	0
1	49	1.5	1	1	0	0	2	1	4	1	1	1	1	NA	1	0	0	55	0	55	0
1	51	1.8	1	2	0	0	2	1	4	1	1	1	1	0	1	1	1	55	0	55	0
1	50	1.5	1	2	0	0	3	2	3	2	1	1	1	1	1	1	1	55	0	55	0
1	36	NA	NA	1	0	NA	2	1	6	1	1	1	1	0	1	1	0	55	0	55	0
1	33	3	2	2	0	1	2	3	4	3	1	1	1	0	1	1	1	55	0	55	0
1	64	3.5	2	1	0	0	NA	1	3	1	1	1	1	0	1	0	0	55	0	55	0
1	28	2.1	2	1	0	1	2	3	3	12	1	1	1	NA	1	1	1	54	0	54	0
1	34	2	1	1	1	0	2	1	4	2	1	1	1	1	1	1	1	54	0	54	0
1	44	1	1	2	0	0	3	1	4	1	0	0	0	0	1	1	1	53	0	53	0
1	58	1.8	1	1	0	0	3	1	4	1	0	0	0	1	1	1	1	54	0	54	0
1	61	3.5	2	1	0	0	2	3	3	24	1	1	1	0	1	1	1	41	1	41	1
1	28	3	2	1	0	0	2	1	5	1	0	0	0	1	1	1	1	54	0	54	0
1	44	NA	NA	1	0	0	2	3	3	3	1	1	1	0	1	1	1	53	0	53	0
1	56	2.5	2	2	0	0	NA	3	3	10	1	1	1	0	1	1	1	53	0	53	0
1	59	1.5	1	1	0	0	2	1	2	1	1	1	1	NA	1	1	0	53	0	53	0
1	60	NA	NA	1	0	0	NA	1	4	1	1	1	1	NA	1	1	0	53	0	53	0
1	41	2.2	2	1	0	0	3	1	3	1	1	1	1	0	1	1	1	11	0	11	0
1	63	3	2	1	0	0	2	1	5	1	0	0	0	0	1	1	1	53	0	53	0
1	48	3.3	2	1	0	1	2	1	5	1	1	1	1	1	1	1	1	52	0	52	0
1	61	1.2	1	1	0	0	2	3	3	21	1	1	1	0	1	1	1	52	0	52	0
1	53	2.1	2	1	0	0	2	2	3	2	1	1	1	0	1	1	1	52	0	52	0
1	51	1	1	1	0	0	3	2	3	0	1	1	1	0	1	1	NA	21	0	21	0
1	41	1.8	1	1	0	NA	2	2	4	2	1	1	1	0	1	1	1	51	0	51	0
1	42	2.5	2	1	0	0	3	1	3	1	1	1	1	1	1	1	0	52	0	52	0
1	72	1.3	1	1	0	0	3	3	3	3	0	0	0	0	1	1	1	52	0	52	0
1	71	1.2	1	1	0	0	1	1	2	0	1	1	1	0	1	1	0	51	0	51	0
1	53	2.7	2	1	0	0	3	1	3	1	1	1	1	1	1	0	0	51	0	51	0
1	49	2.5	2	1	0	0	2	2	5	0	1	1	1	0	1	1	1	51	0	51	0
1	62	1.8	1	1	0	0	2	2	2	2	1	1	1	0	1	1	1	51	0	51	0
1	39	4.5	2	1	0	0	1	1	3	1	1	1	1	0	1	1	1	51	0	51	0
1	33	NA	NA	1	0	NA	1	1	3	1	1	1	1	0	1	1	0	51	0	51	0
1	39	1.5	1	1	0	1	2	3	4	5	1	1	1	0	1	1	1	52	0	52	0
1	67	3.5	2	1	0	1	2	1	5	4	1	1	1	0	1	1	1	52	0	52	0
1	38	0.5	1	1	0	1	2	2	4	4	0	0	0	1	1	1	1	52	0	52	0
1	44	1.1	1	1	0	0	2	2	4	1	1	1	1	0	1	1	1	51	0	51	0
1	52	2.5	2	1	0	0	2	2	6	2	1	1	1	0	1	1	1	51	0	51	0
1	46	4	2	1	0	1	2	2	2	19	1	1	1	0	1	1	1	52	0	52	0
1	66	3.5	2	1	0	0	2	1	4	0	1	1	1	0	1	1	0	51	0	51	0
1	61	1.6	1	1	0	0	3	2	5	2	0	0	0	1	1	1	0	51	0	51	0
1	36	3.5	2	1	0	NA	NA	1	2	1	0	0	0	1	1	1	1	51	0	51	0
1	65	2.5	2	1	0	0	2	1	4	1	0	0	0	0	1	1	0	50	0	50	0
1	47	1.8	1	1	0	0	2	1	2	1	1	1	1	1	1	1	1	50	0	38	0
1	66	1.8	1	1	0	0	3	1	4	1	1	1	1	1	1	1	1	13	1	13	1
1	37	2.8	2	1	0	0	3	2	6	2	1	1	1	1	1	1	1	50	0	49	0
1	50	2.3	2	1	0	1	3	1	4	1	0	0	0	0	1	1	0	50	0	50	0
1	42	1.8	1	2	0	0	2	1	6	1	1	1	1	0	1	1	1	51	0	51	0
1	52	4	2	1	0	0	2	2	4	2	1	1	1	0	1	1	1	50	0	50	0
1	34	1.6	1	1	0	0	2	3	3	7	1	1	1	0	1	1	1	50	0	50	0
1	55	1.8	1	1	0	1	3	2	4	3	1	0	1	1	1	1	1	50	0	50	0
1	41	2	1	1	0	0	2	1	5	1	1	1	1	0	1	1	1	50	0	50	0
1	39	1	1	1	0	0	2	2	3	4	1	1	1	0	0	1	1	50	0	50	0
1	55	1.8	1	1	0	0	1	1	4	1	1	1	1	0	1	1	0	50	0	50	0
1	74	2	1	1	0	1	2	1	1	1	1	1	1	1	1	1	0	50	0	50	0
1	31	0.8	1	2	0	0	3	1	4	1	0	0	0	0	1	1	1	50	0	50	0
1	44	2	1	1	0	0	3	1	4	1	1	1	1	0	1	1	1	50	0	50	0
1	37	NA	NA	1	0	0	2	2	3	2	1	1	1	NA	1	1	1	49	0	49	0
1	62	1.5	1	1	0	0	2	1	3	1	1	1	1	0	1	1	0	49	0	49	0
1	47	1.6	1	1	0	0	2	1	3	2	1	1	1	0	1	1	1	49	0	49	0
1	54	1.8	1	2	0	0	3	1	3	1	0	0	0	1	1	1	1	50	0	50	0
1	58	3	2	1	0	0	1	1	5	1	1	1	1	0	0	1	1	50	0	50	0
1	67	2	1	1	0	0	2	2	5	2	1	1	1	0	1	1	0	49	0	49	0
1	48	NA	NA	2	0	0	2	1	2	1	1	1	1	1	1	0	0	49	0	37	0
1	56	2.5	2	1	0	1	NA	5	6	6	0	0	0	1	1	1	1	49	0	49	0
1	51	1.5	1	1	0	1	2	1	4	1	1	1	1	0	0	1	0	49	0	49	0
1	65	4.5	2	1	0	0	3	1	3	1	0	0	0	0	1	1	0	49	0	49	0
1	36	3.5	2	2	0	0	2	1	3	1	1	1	1	1	1	1	1	49	0	49	0
1	53	2	1	1	0	0	3	1	3	1	1	1	1	1	1	1	1	48	0	48	0
1	67	2	1	1	0	1	2	1	4	2	1	1	1	0	1	1	1	48	0	48	0
1	40	2.2	2	1	0	0	3	1	5	1	1	1	1	0	1	1	1	48	0	48	0
1	34	2.2	2	2	0	0	3	1	3	1	1	1	1	1	1	1	1	48	0	48	0
1	43	1.2	1	1	0	0	2	1	2	1	1	1	1	0	1	1	1	48	0	48	0
1	48	1.8	1	1	0	0	2	2	3	2	1	1	1	0	1	1	1	48	0	48	0
1	49	1.8	1	1	0	0	2	1	3	1	1	1	1	0	1	0	0	48	0	48	0
1	38	5	2	1	0	1	2	2	3	2	0	0	1	0	1	1	1	47	0	47	0
1	40	2	1	2	0	0	2	1	6	1	1	1	1	0	1	1	1	47	0	47	0
1	50	4	2	1	0	0	2	4	4	16	1	1	1	0	1	1	1	47	0	47	0
1	61	1.8	1	1	1	0	2	1	3	2	1	1	1	0	1	1	1	47	0	47	0
1	42	2	1	1	0	0	2	1	2	1	1	1	1	0	1	1	0	48	0	48	0
1	51	2	1	1	0	NA	NA	3	3	3	1	1	1	0	0	1	1	47	0	47	0
1	49	3	2	1	0	0	3	1	7	1	1	1	1	1	1	1	1	25	0	25	0
1	54	2.5	2	1	0	0	3	1	3	1	0	0	0	1	1	1	1	17	0	17	0
1	44	3	2	1	0	0	2	1	4	1	1	1	1	0	1	1	1	47	0	47	0
1	37	1.5	1	2	0	0	2	1	4	1	1	1	1	0	1	1	1	47	0	47	0
1	63	2	1	1	0	1	2	1	5	1	1	1	1	0	1	1	0	47	0	47	0
1	49	NA	NA	2	0	NA	NA	1	4	1	1	1	1	0	1	1	1	47	0	47	0
1	57	1	1	1	0	NA	NA	2	4	2	1	1	1	NA	1	1	1	47	0	47	0
1	54	0.6	1	2	0	0	2	1	2	5	1	1	1	0	1	1	1	47	0	47	0
1	47	2.5	2	1	0	0	2	1	2	3	1	1	1	0	1	1	1	46	0	46	0
1	37	2	1	1	0	0	3	2	3	2	1	1	1	0	1	1	1	47	0	47	0
1	56	1.2	1	1	0	0	3	1	6	1	0	0	0	0	1	1	1	45	0	45	0
1	47	NA	NA	1	0	NA	NA	2	3	2	NA	NA	NA	NA	NA	1	1	45	0	45	0
1	51	1.8	1	2	0	0	3	1	3	1	1	1	1	0	1	1	1	46	0	46	0
1	55	5	2	1	0	0	NA	1	3	1	1	0	1	0	1	1	1	45	0	45	0
1	56	2.5	2	1	1	1	NA	1	3	2	1	1	1	0	1	0	0	45	0	45	0
1	37	5	2	1	0	0	1	4	5	7	1	1	1	0	1	1	1	45	0	45	0
1	44	1.5	1	1	0	0	1	1	3	1	1	1	1	0	1	0	0	45	0	45	0
1	54	NA	NA	1	0	1	3	5	5	21	1	1	1	1	1	1	1	45	0	44	0
1	56	2.2	2	2	0	0	1	3	3	3	1	1	1	0	1	1	1	45	0	45	0
1	60	2.5	2	1	0	0	2	1	3	1	1	1	1	0	1	1	1	33	0	33	0
1	58	1.5	1	1	0	0	2	1	5	1	1	1	1	0	1	1	1	45	0	45	0
1	57	NA	NA	2	0	NA	NA	5	5	10	0	0	0	NA	1	1	1	44	0	44	0
1	45	2.5	2	2	0	0	3	1	3	1	0	0	0	0	1	1	1	44	0	44	0
1	45	1.5	1	1	0	0	NA	1	3	1	1	1	1	0	1	1	1	45	0	45	0
1	46	1.5	1	1	0	0	2	1	1	1	1	1	1	0	1	0	0	45	0	45	0
1	42	1.5	1	1	0	1	3	2	5	0	1	1	1	0	1	1	1	45	0	45	0
1	47	3	2	1	0	0	3	2	5	2	1	1	1	0	1	1	0	45	0	45	0
1	61	1.5	1	1	0	0	NA	2	2	4	1	1	1	0	1	1	1	44	0	44	0
1	47	1.8	1	1	0	0	3	2	6	2	1	1	1	NA	1	1	1	45	0	45	0
1	63	1.5	1	1	0	0	2	3	4	4	1	1	1	0	1	1	1	44	0	44	0
1	44	3	2	1	0	0	3	2	4	2	0	0	0	1	1	1	1	44	0	44	0
1	59	2.2	2	1	0	0	3	1	5	1	0	0	0	1	1	1	1	45	0	45	0
1	68	4	2	1	0	0	2	1	5	1	1	1	1	NA	1	1	0	44	0	44	0
1	44	1.5	1	2	0	0	3	1	4	1	1	1	1	0	1	1	1	44	0	44	0
1	53	2.2	2	1	0	0	3	2	4	2	1	1	1	1	1	1	1	44	0	44	0
1	39	NA	NA	1	0	NA	NA	1	4	1	1	1	1	0	1	1	1	44	0	44	0
1	40	1.5	1	1	0	0	2	1	4	2	1	1	1	NA	1	1	1	43	0	43	0
2	39	2.1	2	2	0	0	2	1	3	1	1	1	1	0	1	1	1	114	0	114	0
2	37	1.2	1	1	0	0	2	1	3	2	1	1	1	NA	1	1	1	112	0	112	0
2	41	1.5	1	1	0	0	NA	1	2	1	1	1	1	0	1	1	0	112	0	112	0
2	42	1.3	1	2	0	0	2	1	4	1	1	1	1	0	1	1	1	112	0	112	0
2	46	NA	NA	1	0	NA	NA	1	5	1	1	1	1	0	1	1	0	111	0	111	0
2	48	1.9	1	1	0	0	2	1	1	1	1	1	1	0	1	1	1	111	0	111	0
2	45	2.5	2	1	0	0	3	1	5	1	1	1	1	0	1	1	1	111	0	111	0
2	61	1.6	1	1	0	0	2	1	3	1	1	1	1	0	1	1	1	112	0	112	0
2	34	1	1	2	0	1	2	1	4	2	1	1	1	NA	1	1	1	111	0	111	0
2	55	3.5	2	1	0	1	2	2	6	2	1	1	1	0	1	1	1	111	0	111	0
2	73	2	1	1	0	0	2	1	2	1	1	1	1	0	1	1	0	111	1	111	1
2	49	1.5	1	1	0	0	2	1	4	1	0	0	0	NA	1	0	0	110	0	110	0
2	52	0.6	1	1	0	0	3	2	5	2	1	1	1	0	1	1	1	110	0	110	0
2	48	2.3	2	1	0	0	2	1	2	1	1	0	1	1	1	1	1	60	0	60	0
2	66	4	2	1	0	0	2	1	2	1	1	1	1	NA	1	0	1	110	0	110	0
2	52	NA	1	1	0	NA	NA	2	3	2	1	1	1	NA	0	1	1	109	0	109	0
2	66	2.5	2	1	0	0	3	1	5	1	0	0	0	0	1	1	0	109	0	109	0
2	63	1.9	1	2	1	NA	NA	1	3	1	1	1	1	0	1	1	1	109	0	109	0
2	31	NA	NA	2	0	NA	NA	1	4	1	1	1	1	0	NA	1	1	109	0	109	0
2	60	0.5	1	1	0	0	2	1	5	1	1	1	1	1	1	1	0	108	0	108	0
2	57	2	1	1	0	NA	NA	1	2	1	1	1	1	1	1	1	1	105	0	105	0
2	52	2.8	2	2	0	1	3	1	4	1	1	1	1	1	1	1	1	105	0	105	0
2	60	1.5	1	1	0	0	2	1	5	1	1	1	1	0	1	1	0	105	0	105	0
2	50	NA	NA	1	0	NA	NA	1	4	1	1	1	1	0	1	1	0	105	0	105	0
2	41	2.2	2	1	0	0	1	1	2	1	1	1	1	1	1	1	0	104	0	104	0
2	61	NA	1	1	0	NA	NA	1	5	1	1	0	1	1	NA	1	0	104	0	104	0
2	64	1.5	1	1	0	0	2	1	3	0	0	0	0	0	1	1	0	103	0	103	0
2	50	1	1	2	0	0	3	1	6	1	1	1	1	NA	1	1	1	103	0	103	0
2	76	3	2	1	0	0	2	1	2	1	1	1	1	0	1	0	0	103	0	103	0
2	39	1.5	1	1	0	0	3	1	3	1	1	1	1	1	1	1	1	105	0	105	0
2	51	0.7	1	2	0	0	NA	1	5	1	1	1	1	0	0	1	1	103	0	103	0
2	40	0.4	1	1	0	0	2	1	5	1	1	1	1	NA	1	1	1	103	0	103	0
2	53	2.2	2	1	0	1	2	1	3	4	1	1	1	0	1	1	1	101	0	101	0
2	48	2	1	1	0	0	2	1	5	1	1	1	1	0	1	1	0	101	0	101	0
2	42	NA	NA	2	0	NA	NA	1	2	1	1	1	1	0	1	1	1	100	0	100	0
2	41	NA	2	1	0	NA	NA	1	2	0	1	1	1	1	1	1	1	100	0	100	0
2	46	1	1	1	0	0	2	1	2	1	1	1	1	0	1	1	0	99	0	99	0
2	58	1.3	1	1	0	0	2	1	1	1	0	0	0	1	1	1	1	99	0	99	0
2	35	1	1	1	0	NA	NA	1	7	1	1	1	1	1	1	1	1	99	0	99	0
2	53	1	1	2	0	0	2	1	3	1	1	1	1	0	1	1	1	99	0	99	0
2	43	NA	NA	1	0	0	2	1	4	1	1	1	1	0	1	1	0	99	0	99	0
2	72	1.5	1	2	0	0	NA	1	2	1	1	1	1	0	1	0	1	87	1	87	1
2	49	NA	NA	2	0	NA	NA	2	4	2	1	1	1	0	1	1	1	99	0	99	0
2	60	NA	NA	1	0	NA	NA	1	2	1	0	0	0	0	1	1	0	98	0	98	0
2	69	2	1	1	0	1	2	1	2	1	1	1	1	0	1	1	0	62	0	62	0
2	47	2.5	1	1	0	NA	2	1	5	1	1	1	1	0	1	1	0	98	0	98	0
2	43	1.6	1	2	0	0	3	1	4	1	0	0	0	0	1	1	1	98	0	98	0
2	57	3	2	1	0	NA	2	2	4	2	0	0	0	1	1	1	0	59	0	59	0
2	54	1	1	1	0	1	3	1	2	1	1	1	1	0	1	1	0	97	0	97	0
2	43	2.5	2	1	0	0	NA	2	4	2	1	1	1	0	1	1	1	96	0	96	0
2	48	2	1	1	0	0	3	1	4	1	1	1	1	0	1	NA	NA	59	0	59	0
2	36	NA	NA	1	0	NA	NA	1	6	1	1	1	1	1	1	1	0	96	0	96	0
2	41	2.2	2	1	0	NA	2	1	5	1	1	1	1	1	1	1	1	96	0	96	0
2	43	2	1	1	0	NA	2	1	4	1	1	1	1	0	1	1	0	96	0	96	0
2	36	NA	NA	2	0	NA	NA	1	5	1	1	0	0	1	1	1	1	96	0	96	0
2	30	NA	NA	1	0	NA	NA	1	7	3	1	1	1	0	1	1	1	71	1	71	1
2	49	2.5	2	1	0	NA	2	1	3	1	1	1	1	NA	1	1	0	95	0	95	0
2	71	1.2	1	1	0	0	2	1	4	1	1	1	1	0	1	0	0	95	0	95	0
2	59	3	2	2	0	0	3	3	7	3	0	0	0	1	1	1	1	15	1	11	1
2	40	1.2	1	1	0	1	2	2	4	2	1	1	1	0	1	1	1	95	0	95	0
2	48	0.8	1	2	0	0	2	1	7	1	1	1	1	0	1	1	1	94	0	94	0
2	45	1.2	1	2	0	0	NA	1	4	1	0	0	0	1	1	0	0	94	0	94	0
2	29	NA	NA	1	0	NA	NA	1	4	1	1	1	1	0	1	0	0	94	0	94	0
2	69	2	1	1	0	1	2	1	5	1	1	1	1	0	1	0	0	94	0	94	0
2	31	1	1	1	0	0	2	1	4	1	1	1	1	0	1	1	0	94	0	94	0
2	53	1.5	1	1	0	NA	2	1	2	3	0	0	0	1	1	1	1	94	0	94	0
2	56	3	2	1	0	0	NA	1	2	1	1	1	1	0	1	1	0	57	0	57	0
2	48	2	1	1	0	1	2	1	6	1	1	1	1	1	0	1	0	93	0	93	0
2	64	NA	NA	1	0	NA	NA	1	3	1	1	1	1	0	1	0	0	93	0	93	0
2	41	0.6	1	1	0	0	2	1	4	1	1	1	1	NA	1	1	0	93	0	93	0
2	47	1.8	1	1	0	0	2	1	3	1	1	1	1	0	1	1	0	92	0	92	0
2	38	1.2	1	2	0	0	3	1	4	1	0	0	0	0	1	1	1	92	0	92	0
2	27	1.5	1	1	0	1	3	1	3	1	0	0	0	0	1	1	0	91	0	91	0
2	69	1.2	1	2	0	0	2	1	2	1	1	1	1	NA	1	1	1	91	0	91	0
2	61	NA	2	1	0	NA	NA	1	4	1	1	1	1	0	1	1	1	90	0	90	0
2	44	1.6	1	2	0	0	3	1	5	1	0	0	0	1	1	1	0	14	1	14	1
2	40	4	2	1	0	1	3	1	4	1	1	1	1	1	1	1	1	75	0	75	0
2	42	2	1	1	0	1	2	1	5	1	0	0	0	0	1	1	1	89	0	89	0
2	41	1	1	1	0	1	2	1	3	1	1	1	1	0	1	0	1	89	0	89	0
2	60	2	1	1	0	0	2	2	7	2	1	1	1	NA	1	1	1	89	0	89	0
2	59	4	2	1	0	0	2	1	4	1	1	1	1	0	1	1	0	89	0	89	0
2	41	1.3	1	2	0	0	3	1	3	1	1	1	1	0	1	1	1	88	0	88	0
2	77	2	1	1	0	1	2	1	2	1	1	1	1	NA	1	0	0	88	0	88	0
2	45	0.4	1	1	1	NA	2	1	6	1	1	1	1	NA	0	1	0	88	0	88	0
2	60	NA	NA	1	0	1	3	1	5	1	0	0	0	0	1	1	0	87	0	87	0
2	46	2	1	1	0	0	2	1	4	1	1	1	1	0	1	1	0	87	0	87	0
2	55	2.2	2	1	0	0	2	1	4	1	1	1	1	1	1	1	1	87	0	87	0
2	57	2	1	1	0	NA	2	1	1	1	1	1	1	0	1	0	0	86	0	86	0
2	43	2.5	2	1	0	0	2	1	3	1	1	0	1	NA	1	1	0	74	1	74	1
2	44	0.4	1	1	0	0	2	2	3	2	1	1	1	0	1	1	1	86	0	86	0
2	50	NA	NA	1	0	NA	NA	1	2	1	1	0	1	0	0	0	1	86	0	86	0
2	48	2	1	1	0	0	NA	1	3	1	1	1	1	0	1	0	1	85	0	85	0
2	44	5	2	1	0	0	2	1	4	1	1	1	1	0	1	1	0	85	0	85	0
2	47	2	1	2	0	0	1	1	3	1	1	1	1	0	1	1	1	86	0	86	0
2	46	2	1	2	0	0	2	2	5	2	1	1	1	0	1	0	0	86	0	86	0
2	65	2	1	1	0	0	2	1	7	1	1	1	1	1	1	1	0	85	0	85	0
2	50	2	1	1	0	0	2	1	5	1	1	1	1	0	1	1	0	85	0	85	0
2	33	2	1	1	0	0	2	1	3	1	1	1	1	1	1	1	0	85	0	85	0
2	47	NA	2	1	0	0	2	2	7	2	1	1	1	0	1	1	0	85	0	25	0
2	49	3	2	1	0	0	2	1	2	1	1	1	1	0	1	1	0	84	0	84	0
2	45	1.5	1	1	0	NA	NA	1	3	1	1	1	1	0	1	1	0	85	0	85	0
2	46	3.5	2	2	0	0	3	2	3	2	1	1	1	0	1	1	0	84	0	84	0
2	42	2	1	2	0	0	2	1	5	1	1	1	1	0	1	1	1	85	0	85	0
2	40	1	1	1	0	0	2	1	4	0	1	1	0	NA	1	1	0	84	0	84	0
2	63	1	1	1	0	0	2	1	5	1	1	1	1	0	0	NA	NA	40	0	40	0
2	39	2	1	1	0	0	1	2	3	2	1	1	1	0	1	1	0	84	0	84	0
2	45	NA	NA	1	0	NA	NA	1	4	1	1	1	1	0	1	1	1	83	0	83	0
2	49	1.5	1	1	0	0	1	1	5	1	1	1	1	0	1	1	0	84	0	84	0
2	56	1.2	1	2	0	0	2	1	3	1	1	1	1	0	1	1	1	83	0	83	0
2	60	2	1	1	0	0	2	1	3	1	1	1	1	0	1	1	1	83	0	83	0
2	43	3	2	1	0	0	3	1	3	1	1	1	1	0	1	1	0	83	0	83	0
2	65	2	1	1	0	0	3	1	3	1	0	0	0	1	1	1	0	83	0	83	0
2	81	2	1	1	0	0	2	1	3	1	1	1	1	NA	1	0	0	83	0	83	0
2	50	1	1	2	0	0	2	1	2	1	1	1	1	0	1	1	NA	40	0	40	0
2	50	2	1	1	0	NA	2	1	3	1	0	0	0	0	1	1	0	83	0	83	0
2	25	1.8	1	2	0	0	3	2	3	2	1	1	1	0	1	1	1	40	0	40	0
2	48	2.2	2	2	0	1	3	1	3	1	0	1	0	0	1	1	1	82	0	82	0
2	60	1.5	1	1	0	0	2	1	2	1	1	1	1	0	1	1	0	82	0	82	0
2	58	2	1	1	0	0	3	1	2	1	0	0	0	1	1	1	1	82	0	82	0
2	65	1.5	1	1	0	0	1	1	2	1	1	1	1	0	1	1	1	83	0	83	0
2	51	1	1	2	0	0	3	1	4	1	1	1	1	0	1	1	1	82	0	82	0
2	47	2	1	1	0	0	2	2	4	2	1	1	1	0	1	1	0	82	0	82	0
2	37	3	2	1	0	1	2	1	5	1	1	1	1	0	0	1	0	82	0	82	0
2	51	1.5	1	2	0	0	2	1	2	1	0	0	0	0	1	1	1	46	1	46	1
2	53	NA	NA	1	0	0	NA	1	4	1	0	0	0	0	1	1	1	82	0	82	0
2	54	2.1	2	1	0	0	2	1	5	1	1	1	1	0	1	1	1	81	0	81	0
2	32	1	1	1	0	0	2	1	5	1	1	1	1	0	1	1	1	81	0	81	0
2	41	1.6	1	1	0	1	2	1	4	1	1	1	1	0	1	1	0	81	0	81	0
2	72	3	2	1	0	0	2	1	2	1	1	1	1	0	1	1	0	58	1	58	1
2	67	1.5	1	1	0	0	2	1	3	1	1	1	1	0	1	1	0	81	0	57	0
2	52	1.4	1	1	0	1	2	1	1	1	1	1	1	0	1	1	1	81	0	81	0
2	49	2.8	2	1	0	0	2	1	4	1	1	1	1	0	1	0	0	81	0	33	0
2	45	2	1	1	0	0	2	1	5	18	1	1	1	1	1	1	1	81	0	81	0
2	50	2.5	2	1	0	0	2	1	2	1	1	1	1	1	1	1	0	81	0	81	0
2	38	3.5	2	1	0	0	1	1	4	1	1	1	1	0	1	0	1	55	0	55	0
2	48	1	1	2	0	0	2	1	3	1	1	1	1	0	1	1	1	80	0	80	0
2	67	1.2	1	2	0	0	2	1	2	1	0	0	0	1	1	1	1	80	0	80	0
2	54	2	1	1	0	0	2	3	3	3	1	1	1	0	1	1	1	80	0	80	0
2	65	1.5	1	1	0	0	3	2	2	2	1	1	1	1	1	1	0	70	0	70	0
2	43	NA	NA	1	0	NA	NA	1	5	1	1	1	1	0	0	1	1	71	0	71	0
2	30	2.5	2	1	0	0	3	1	4	1	1	1	1	1	1	1	1	80	0	56	0
2	69	NA	NA	1	0	0	2	1	6	1	1	1	1	0	1	0	1	80	0	80	0
2	62	1.5	1	2	1	0	2	1	5	1	1	1	1	0	1	1	0	4	1	4	1
2	54	2	1	1	0	0	NA	1	3	1	1	1	1	0	1	1	0	80	0	80	0
2	49	1.7	1	1	0	1	NA	1	5	1	1	1	1	0	1	1	1	79	0	79	0
2	56	1.5	1	1	0	0	2	1	4	1	1	0	1	0	1	1	0	79	0	79	0
2	39	0.8	1	2	0	0	2	1	3	1	1	1	1	0	1	1	1	79	0	79	0
2	54	NA	NA	1	0	NA	3	1	3	1	1	1	1	1	1	1	1	42	1	42	1
2	35	2.5	2	2	0	0	2	1	1	1	1	1	1	NA	1	1	1	78	0	78	0
2	59	3	2	1	0	0	2	1	3	1	1	1	1	NA	1	1	0	78	0	78	0
2	32	2	1	1	1	0	3	1	4	1	1	0	1	0	1	1	1	78	0	78	0
2	66	2	1	1	0	0	2	1	5	1	1	1	1	0	1	1	0	78	0	78	0
2	48	NA	NA	1	0	NA	NA	1	4	1	1	1	1	NA	0	1	0	77	0	77	0
2	54	2.5	2	1	0	0	2	2	3	2	1	1	1	0	1	1	1	77	0	77	0
2	52	3.2	2	1	0	0	2	1	4	1	1	1	1	1	1	1	1	78	0	78	0
2	54	2	1	1	0	1	2	1	6	1	1	1	1	0	1	1	1	77	0	77	0
2	51	1.2	1	1	0	0	2	1	2	1	1	1	1	0	1	1	0	77	0	77	0
2	61	1.5	1	1	0	0	2	1	4	1	1	1	1	0	1	1	0	76	0	76	0
2	53	2	1	1	0	0	NA	1	4	1	0	0	0	0	1	1	1	76	0	76	0
2	37	1	1	2	0	0	3	1	4	1	0	0	0	0	1	1	0	76	0	76	0
2	59	2.5	2	1	0	0	2	1	3	1	1	1	1	NA	1	1	1	76	0	76	0
2	55	3	2	1	0	0	2	1	5	1	1	1	1	1	1	1	1	76	0	76	0
2	42	2.5	2	1	0	0	2	1	5	1	1	1	1	0	1	1	0	76	0	76	0
2	57	3	2	1	0	0	2	1	3	1	1	1	1	NA	1	1	1	40	1	28	1
2	48	1.8	1	2	0	0	1	1	7	1	1	1	1	0	1	1	1	75	0	75	0
2	36	2	1	1	0	1	2	3	5	3	1	1	1	0	1	1	1	75	0	75	0
2	50	NA	NA	1	0	NA	NA	1	4	1	1	1	1	0	1	1	0	75	0	75	0
2	71	1.5	1	1	0	0	1	1	4	1	1	1	1	0	1	0	0	75	0	75	0
2	42	2.5	2	2	0	0	2	1	4	1	1	1	1	0	1	1	1	74	0	74	0
2	25	NA	NA	2	0	NA	2	1	3	1	0	0	0	0	1	1	1	74	0	74	0
2	29	2	1	1	0	0	2	1	4	1	1	0	1	1	1	1	1	74	0	74	0
2	53	1.5	1	1	0	0	2	1	1	1	1	1	1	0	1	1	0	74	0	74	0
2	51	1.4	1	2	0	0	3	2	4	2	1	0	1	1	1	1	1	74	0	74	0
2	41	2.5	2	1	0	1	2	1	5	1	1	1	1	0	1	1	1	74	0	74	0
2	61	1	1	2	0	0	2	1	3	1	1	0	1	0	1	1	1	74	0	74	0
2	56	3	2	1	0	0	2	1	3	1	1	0	1	0	1	1	1	74	0	74	0
2	71	3	2	1	0	NA	NA	1	4	1	1	1	1	0	1	0	0	74	0	74	0
2	52	3	2	2	0	0	3	2	3	2	1	1	1	0	1	1	1	74	0	74	0
2	56	0.8	1	2	0	0	1	1	3	1	1	1	1	0	1	1	1	74	0	74	0
2	72	2.5	2	1	0	0	2	1	3	1	1	1	1	0	1	1	1	58	0	58	0
2	28	NA	NA	2	0	NA	NA	1	6	1	0	0	0	0	1	1	1	74	0	74	0
2	42	2.5	2	1	0	1	2	1	1	1	1	1	1	1	1	1	1	74	0	74	0
2	74	1.5	1	1	0	0	NA	1	4	1	1	1	1	0	1	0	0	74	0	74	0
2	66	NA	1	1	0	0	2	1	2	1	0	0	0	0	1	1	1	73	0	73	0
2	37	2.5	2	1	0	0	2	1	4	1	1	1	1	0	1	1	0	73	0	73	0
2	44	1.5	1	1	0	0	2	1	6	1	1	1	1	1	1	1	0	73	0	73	0
2	47	1	1	1	0	0	2	1	1	1	1	1	1	0	1	1	0	73	0	73	0
2	51	3.5	2	1	0	0	2	1	3	1	1	1	1	1	1	1	1	73	0	73	0
2	47	2.5	2	2	0	0	3	1	5	1	1	0	0	0	1	1	1	73	0	73	0
2	67	1.8	1	1	0	0	1	1	5	1	1	1	1	0	1	1	0	73	0	73	0
2	42	NA	NA	2	0	NA	NA	1	4	1	1	1	1	0	1	1	1	73	0	73	0
2	33	1.6	1	1	0	0	2	1	2	1	1	1	1	1	1	1	1	73	0	73	0
2	49	1.5	1	1	0	0	2	1	1	1	1	1	1	1	1	1	0	73	0	46	0
2	47	1.5	1	2	0	1	2	1	2	1	1	1	1	0	1	1	1	72	0	72	0
2	50	1.5	1	2	0	1	2	1	2	1	1	1	1	NA	1	1	1	73	0	73	0
2	48	1.5	1	2	0	0	3	2	7	2	1	1	1	0	1	1	0	72	0	72	0
2	49	1.5	1	1	0	0	2	1	6	1	1	1	1	NA	1	1	1	73	0	73	0
2	48	1.5	1	2	0	0	3	1	4	1	0	0	0	1	1	1	1	72	0	72	0
2	33	3	2	1	0	1	2	1	3	1	1	1	1	0	1	1	1	72	0	72	0
2	50	2	1	1	0	0	3	1	4	1	0	1	0	0	1	1	1	79	0	79	0
2	39	2.5	2	2	0	0	3	1	3	1	1	1	1	1	1	1	1	71	0	71	0
2	67	1	1	1	0	1	2	2	5	2	1	1	1	0	1	1	0	71	0	71	0
2	61	2.5	2	2	0	0	3	1	6	1	1	1	1	0	1	1	1	62	0	62	0
2	66	2	2	1	0	1	2	1	3	1	1	1	1	0	1	1	1	71	0	71	0
2	52	1.5	1	1	0	1	3	1	3	1	1	1	1	1	1	1	0	72	0	72	0
2	44	1.5	1	1	0	0	2	1	3	1	1	1	1	NA	1	1	0	71	0	71	0
2	55	3.5	2	1	0	1	3	1	3	1	0	0	0	1	1	1	1	71	0	71	0
2	52	2.5	2	1	0	0	NA	1	4	1	0	0	0	1	1	0	0	71	0	71	0
2	58	1.5	1	1	0	0	2	1	3	1	1	1	1	NA	1	1	0	71	0	71	0
2	38	3	2	1	0	0	2	1	3	1	1	1	1	0	1	1	0	71	0	71	0
2	46	2	1	1	0	0	2	1	2	1	1	1	1	0	1	1	1	71	0	71	0
2	54	1.5	1	1	0	0	2	1	4	1	0	0	0	NA	1	1	1	71	0	71	0
2	51	1.5	1	1	0	0	2	1	5	1	1	1	1	0	1	1	0	71	0	71	0
2	72	1.6	1	1	0	1	2	1	3	1	1	1	1	0	1	NA	NA	52	0	52	0
2	36	2.8	2	2	0	0	NA	1	3	1	1	1	1	0	1	1	1	71	0	71	0
2	54	2.5	2	1	0	1	3	1	2	1	1	0	1	1	1	1	1	70	0	70	0
2	60	2	1	1	0	0	2	1	5	1	0	0	0	0	1	1	0	61	1	25	1
2	51	1.8	1	2	0	0	2	1	2	1	1	1	1	0	1	1	1	70	0	70	0
2	50	2.5	2	1	0	0	2	1	4	2	1	1	1	0	1	1	1	69	0	69	0
2	54	2	1	1	0	0	2	1	3	1	1	1	1	1	1	1	1	69	0	69	0
2	54	0.6	1	1	0	0	2	1	4	1	1	1	1	0	1	1	0	70	0	70	0
2	35	1	1	1	0	0	NA	1	4	1	1	1	1	0	0	1	1	69	0	69	0
2	36	0.5	1	1	0	0	2	1	2	1	1	1	1	0	1	1	0	70	0	70	0
2	41	2	1	1	0	0	2	1	5	1	1	1	1	0	1	1	0	69	0	69	0
2	66	2	1	1	1	0	2	2	4	2	1	1	1	0	1	1	1	53	0	53	0
2	40	1	1	1	0	0	NA	3	4	3	1	1	1	0	1	1	1	69	0	69	0
2	68	2	1	1	0	0	2	2	4	2	1	1	1	0	1	1	0	69	0	69	0
2	41	1.7	1	2	0	0	NA	1	4	1	1	1	1	0	1	1	1	69	0	69	0
2	46	5	2	2	0	NA	3	1	6	1	0	0	0	0	1	1	1	69	0	69	0
2	41	2.2	2	1	0	0	3	2	4	2	0	1	0	0	1	1	1	51	0	51	0
2	54	NA	1	1	0	0	1	1	3	1	1	1	1	0	1	1	1	69	0	69	0
2	54	1.4	1	2	0	0	2	1	4	1	1	1	1	NA	1	1	1	68	0	68	0
2	67	3	2	1	0	0	3	1	4	1	1	0	1	1	1	1	1	69	0	69	0
2	75	2.5	2	1	0	0	2	1	3	1	1	1	1	0	1	0	0	68	0	68	0
2	33	1.5	1	1	0	1	2	1	4	1	0	1	0	1	1	1	0	68	0	68	0
2	64	3	2	1	0	0	2	1	3	1	1	1	1	0	1	1	1	69	0	69	0
2	48	3.5	2	2	0	0	3	1	2	1	0	0	0	0	1	1	1	68	0	68	0
2	73	3	2	1	0	0	2	1	2	1	1	1	1	0	1	0	0	68	0	68	0
2	51	2	1	2	0	0	2	1	4	1	1	1	1	1	1	1	1	68	0	68	0
2	48	1.2	1	2	0	0	2	1	4	1	1	1	1	0	1	1	1	68	0	68	0
2	36	2	1	1	0	0	2	1	2	1	1	1	1	0	1	1	NA	52	0	52	0
2	40	2	1	1	0	1	3	1	3	1	1	1	1	0	1	1	1	68	0	68	0
2	46	1.7	1	2	0	1	2	1	3	1	1	1	1	0	1	1	1	67	0	67	0
2	46	NA	NA	2	0	NA	NA	1	3	1	1	0	1	0	0	1	1	67	0	67	0
2	44	2	1	2	0	1	NA	1	4	1	1	1	1	0	1	1	1	68	0	68	0
2	65	2	1	2	0	0	2	1	3	1	1	1	1	0	1	1	1	68	0	68	0
2	50	2.5	2	1	0	NA	NA	3	3	3	1	1	1	1	1	1	1	19	1	19	1
2	67	1.4	1	2	0	0	2	2	4	2	1	1	1	1	1	1	1	68	0	68	0
2	35	1.5	1	1	0	0	3	1	2	1	1	1	0	1	1	1	1	67	0	67	0
2	40	3	2	2	0	0	2	1	4	1	1	1	1	0	1	1	0	70	0	70	0
2	47	3	2	1	0	0	2	3	6	3	1	1	1	0	1	1	1	67	0	67	0
2	40	1.5	1	2	0	0	2	1	4	1	1	1	1	0	1	1	1	67	0	67	0
2	63	0.6	1	1	0	0	2	1	2	1	1	1	1	0	0	1	1	67	0	67	0
2	42	NA	NA	2	0	0	NA	1	3	1	1	1	1	0	1	1	1	67	0	67	0
2	35	2	1	1	0	1	2	1	4	1	1	1	1	0	1	1	1	67	0	67	0
2	55	NA	NA	1	0	0	2	1	5	1	1	1	1	0	1	1	1	33	0	33	0
2	47	2.5	2	2	0	0	2	1	2	1	1	1	1	0	1	1	1	67	0	67	0
2	55	1	1	2	1	0	2	1	4	1	1	1	1	0	1	1	1	67	0	67	0
2	78	3	2	1	0	0	2	1	4	1	1	1	1	0	0	0	0	67	0	67	0
2	48	NA	1	2	0	NA	3	1	4	1	1	1	1	0	1	1	1	66	0	66	0
2	55	2	1	1	0	0	3	1	3	1	0	0	0	0	1	1	1	66	0	66	0
2	47	1	1	2	0	0	2	1	2	1	1	1	1	0	1	0	1	66	0	66	0
2	43	1.5	1	2	0	1	2	1	6	1	1	1	1	0	1	1	1	67	0	64	0
2	57	1.5	1	2	0	0	2	1	3	1	1	1	1	0	1	0	1	66	0	66	0
2	27	NA	NA	2	0	NA	NA	2	4	2	0	0	0	0	1	1	1	57	0	57	0
2	62	2.5	2	2	0	0	3	1	3	1	0	0	0	1	1	1	1	66	0	66	0
2	36	2.5	2	2	0	0	2	2	3	2	1	1	1	0	1	1	1	65	0	65	0
2	63	2	1	1	0	0	3	1	4	1	0	0	0	0	1	1	0	24	0	24	0
2	32	1.5	1	1	0	1	2	1	2	1	1	1	1	0	1	1	1	65	0	65	0
2	58	3	2	2	0	0	2	2	6	2	1	1	1	0	0	1	1	64	0	64	0
2	31	2	1	1	0	0	3	1	3	1	1	1	1	1	1	1	1	65	0	65	0
2	62	1.5	1	2	0	0	2	2	5	2	1	1	1	0	1	1	1	65	0	65	0
2	47	1	1	1	0	0	1	1	2	1	1	1	1	0	0	1	0	64	0	64	0
2	64	2	1	1	1	1	2	1	2	1	1	1	1	0	1	1	0	64	0	64	0
2	56	1.8	1	2	0	0	2	2	4	2	1	1	1	0	0	1	1	64	0	64	0
2	60	2	1	2	0	0	2	1	4	1	1	1	1	0	1	1	1	40	0	40	0
2	52	1.5	1	1	0	0	2	2	4	2	1	1	1	0	1	1	1	64	0	64	0
2	44	1.5	1	2	0	0	2	1	3	1	1	1	1	1	0	1	NA	64	0	64	0
2	66	NA	2	2	0	NA	NA	1	3	1	0	0	0	0	1	1	1	63	0	63	0
2	43	NA	NA	1	0	NA	NA	1	5	1	1	1	1	0	1	1	0	63	0	63	0
2	47	3.5	2	2	0	0	2	1	4	1	1	1	1	0	1	1	1	64	0	64	0
2	41	NA	2	1	0	NA	NA	3	3	3	1	1	1	0	1	1	1	63	0	63	0
2	38	1	1	1	0	0	2	1	3	1	1	1	1	0	1	1	0	64	0	64	0
2	31	1.2	1	2	0	0	3	1	6	1	1	0	1	0	1	1	1	63	0	63	0
2	58	NA	NA	2	0	1	2	1	5	1	1	0	1	1	1	1	1	14	1	14	1
2	61	NA	NA	2	0	NA	NA	1	3	1	1	1	1	0	1	1	0	63	0	63	0
2	31	1.4	2	2	0	0	2	1	3	1	1	0	1	1	1	1	1	63	0	63	0
2	64	NA	NA	1	0	NA	NA	1	4	1	1	1	1	NA	1	0	0	63	0	63	0
2	45	0.8	1	2	0	0	2	1	6	1	1	1	1	0	1	1	1	62	0	62	0
2	45	2.5	2	1	0	0	3	1	4	1	0	0	0	0	1	1	1	62	0	62	0
2	68	2.5	2	1	0	0	2	1	3	1	1	1	1	0	1	0	0	62	0	62	0
2	64	2	1	2	0	0	2	1	2	1	1	1	1	0	1	1	1	62	0	62	0
2	48	1	1	2	0	0	2	1	3	1	1	1	1	0	1	1	1	62	0	62	0
2	85	2.5	2	1	0	0	NA	2	3	2	1	1	1	0	1	0	1	62	0	62	0
2	63	2	1	2	0	0	NA	1	3	1	1	1	1	1	1	1	1	61	0	61	0
2	49	1	1	1	0	0	2	2	2	2	1	1	1	1	1	1	0	61	0	61	0
2	51	1.8	1	2	0	0	2	1	2	1	1	1	1	0	1	1	0	62	0	62	0
2	66	1.2	1	2	0	0	2	1	2	1	1	1	1	0	1	1	1	62	0	62	0
2	64	1.2	1	1	0	0	2	1	4	1	0	0	0	1	1	1	0	62	0	62	0
2	44	1.5	1	1	0	0	1	1	5	1	1	1	1	1	1	1	0	61	0	61	0
2	44	3	2	2	0	NA	NA	1	4	1	1	1	1	0	1	1	1	61	0	61	0
2	33	NA	NA	2	0	0	3	1	3	1	0	0	1	0	1	1	1	61	0	61	0
2	63	2.2	2	2	0	0	2	1	2	1	1	1	1	0	1	1	1	60	0	60	0
2	49	NA	NA	1	0	NA	NA	1	3	1	1	1	1	0	1	1	1	61	0	61	0
2	49	1.5	1	1	0	0	3	2	4	2	0	0	0	1	1	1	1	61	0	61	0
2	43	2	1	2	0	0	2	1	2	1	1	1	1	0	1	1	1	60	0	60	0
2	52	2.5	2	1	0	1	2	1	2	1	1	1	1	1	1	1	1	60	0	60	0
2	50	2.5	2	2	0	0	2	1	5	1	1	1	1	1	1	1	1	61	0	61	0
2	49	1.5	1	1	0	0	2	1	4	1	1	1	1	0	1	1	1	60	0	60	0
2	61	2.8	2	2	0	0	2	2	2	2	1	1	1	0	1	1	1	61	0	61	0
2	52	1.5	1	1	0	0	2	1	2	1	1	1	1	0	1	1	1	60	0	60	0
2	43	2.5	2	1	0	0	2	1	3	1	1	1	1	0	1	0	0	60	0	60	0
2	71	2	1	1	0	0	3	1	4	1	1	1	1	0	1	1	0	61	0	61	0
2	47	1.3	1	1	0	1	3	1	4	1	1	0	1	1	1	1	0	60	0	36	0
2	38	NA	NA	1	0	NA	2	1	5	1	1	1	1	0	1	0	0	60	0	60	0
2	65	2	1	1	0	0	3	1	3	1	0	0	0	0	1	1	1	60	0	60	0
2	31	NA	NA	1	0	NA	2	1	3	1	1	1	1	0	1	1	0	60	0	60	0
2	45	NA	1	1	0	NA	2	1	3	1	1	1	1	0	1	1	1	60	0	60	0
2	46	4	2	1	0	0	NA	1	5	1	1	1	1	0	1	1	0	60	0	60	0
2	40	2	1	1	0	0	NA	1	4	1	1	1	1	0	1	1	0	60	0	60	0
2	61	2.5	2	1	0	1	NA	1	5	1	1	1	1	1	1	1	0	60	0	60	0
2	63	2	1	1	0	0	2	1	3	1	1	1	1	0	1	1	1	60	0	60	0
2	47	2.5	2	2	0	0	3	1	3	1	1	1	1	0	1	1	1	60	0	60	0
2	58	NA	NA	2	0	1	NA	1	4	1	1	1	1	0	1	1	1	59	0	59	0
2	53	3	2	1	0	0	3	1	3	1	1	1	1	1	1	0	0	59	0	59	0
2	40	3	2	1	0	0	2	1	4	1	0	0	0	1	1	1	0	59	0	59	0
2	51	5	2	1	0	0	2	2	4	4	0	0	0	0	1	1	1	60	0	60	0
2	34	2.2	2	2	0	1	3	1	4	1	1	1	1	0	1	1	1	59	0	59	0
2	40	1	1	1	0	0	2	1	4	1	1	1	1	1	1	1	0	59	0	59	0
2	67	2	1	2	0	0	2	2	3	3	1	1	1	0	1	1	0	60	0	60	0
2	50	2	1	2	0	0	3	1	2	1	0	0	0	1	1	1	1	47	0	23	0
2	60	1	1	2	0	0	2	1	3	1	1	1	1	0	1	1	1	59	0	59	0
2	45	2	1	1	0	0	2	1	2	2	1	1	1	0	1	1	1	59	0	59	0
2	43	2.5	2	1	0	1	2	1	4	1	1	1	1	0	1	1	1	59	0	59	0
2	52	2	1	1	0	0	2	1	1	1	1	1	1	1	1	1	0	59	0	59	0
2	68	1.8	1	2	0	0	2	1	2	1	1	1	1	0	1	0	1	58	0	58	0
2	62	NA	1	1	0	1	2	1	1	3	1	1	1	0	1	1	1	58	0	58	0
2	67	NA	NA	1	0	NA	3	1	4	1	1	1	1	NA	1	1	1	59	0	59	0
2	47	2.5	2	1	0	NA	2	2	2	2	1	1	1	0	1	1	1	58	0	58	0
2	54	2.7	2	2	0	0	3	1	3	1	1	1	1	0	1	1	1	59	0	59	0
2	41	2	1	1	0	0	2	1	3	1	1	1	1	0	1	1	0	59	0	59	0
2	41	1	1	1	0	0	2	1	6	1	1	1	1	0	1	1	1	58	0	58	0
2	65	2.5	2	1	0	0	2	1	4	2	1	1	1	0	1	1	0	35	1	35	1
2	48	1.5	1	2	0	0	2	1	6	1	1	1	1	0	1	1	1	58	0	58	0
2	40	2	1	2	0	1	2	3	3	3	1	1	1	0	1	1	1	57	0	57	0
2	65	3	2	1	0	0	2	1	5	1	1	1	1	0	1	1	1	58	0	58	0
2	60	3	2	1	0	0	2	1	3	1	1	0	1	NA	1	1	0	46	0	46	0
2	58	2	1	2	0	0	3	1	5	1	1	0	1	0	1	1	1	57	0	57	0
2	54	2	1	2	0	0	3	1	4	1	0	0	0	0	1	1	1	57	0	57	0
2	45	1.5	1	2	0	0	1	1	2	1	1	1	1	0	1	NA	NA	25	0	25	0
2	63	2	1	2	0	0	2	1	3	1	1	1	1	0	1	1	1	57	0	57	0
2	50	NA	NA	2	0	NA	NA	1	4	1	1	1	1	0	1	1	1	57	0	57	0
2	61	1	1	1	0	0	2	1	5	1	1	1	1	0	1	1	1	57	0	57	0
2	43	2	1	1	0	0	2	1	3	1	1	1	1	1	1	1	1	57	0	57	0
2	56	1.7	1	2	0	0	2	1	5	1	1	1	1	0	1	1	1	56	0	56	0
2	66	2	1	2	0	0	3	1	6	1	0	0	0	0	1	1	1	57	0	57	0
2	57	3	2	2	0	0	2	1	6	1	1	1	1	0	1	0	1	56	0	56	0
2	47	2	1	1	0	0	2	1	3	1	1	1	1	0	1	0	0	56	0	56	0
2	63	3	2	1	0	NA	2	1	3	1	0	0	0	1	1	1	0	56	0	56	0
2	51	1	1	1	0	0	2	1	3	1	1	0	1	0	1	1	0	56	0	52	0
2	48	1.5	1	1	0	1	2	1	5	1	1	1	1	0	1	1	0	57	0	57	0
2	52	NA	NA	2	0	0	2	1	4	1	1	1	1	1	1	1	1	56	0	56	0
2	48	NA	NA	2	1	1	NA	2	3	2	1	1	1	NA	1	1	1	56	0	56	0
2	55	1.5	1	1	0	0	2	1	4	1	1	1	1	NA	1	0	0	55	0	55	0
2	64	NA	NA	1	0	NA	2	1	3	1	1	1	1	1	1	1	1	55	0	55	0
2	56	2.5	2	2	0	0	2	1	3	1	1	0	1	0	1	1	1	56	0	56	0
2	43	1.5	1	1	0	0	2	1	4	1	1	1	1	0	1	1	0	55	0	55	0
2	52	3	2	1	0	0	2	1	5	1	1	1	1	1	1	1	1	55	0	55	0
2	64	3	2	2	0	0	2	1	3	1	1	0	1	0	1	1	1	55	0	55	0
2	39	0.5	1	1	0	NA	3	1	3	3	0	0	0	0	1	1	1	43	1	31	1
2	50	2.5	2	1	0	0	2	2	4	2	1	1	1	0	1	1	1	55	0	55	0
2	49	4.5	2	1	0	0	2	1	3	1	1	1	1	NA	1	1	1	55	0	55	0
2	46	2	1	1	0	0	2	1	5	2	0	0	0	1	1	1	1	55	0	55	0
2	46	1.5	1	1	0	0	2	1	4	1	1	1	1	0	1	1	0	24	0	24	0
2	42	2	1	1	0	0	2	1	3	1	1	1	1	1	1	1	1	55	0	55	0
2	59	1.5	1	2	0	0	3	1	5	1	0	1	0	0	1	1	1	54	0	54	0
2	75	2	1	1	0	0	2	1	3	1	1	1	1	0	1	0	0	54	0	54	0
2	43	1.2	1	2	0	0	2	1	3	1	1	1	1	0	1	1	1	54	0	54	0
2	66	3	2	2	0	0	2	2	3	2	1	1	1	0	1	1	1	53	0	53	0
2	77	2.5	2	2	0	0	2	3	4	3	1	1	1	0	1	0	1	53	0	53	0
2	62	2	1	2	0	0	1	2	3	2	1	1	1	0	1	1	1	53	0	53	0
2	71	2.6	2	1	0	1	2	1	4	1	1	1	1	0	1	1	1	53	0	53	0
2	50	2.5	2	2	0	0	3	1	3	1	1	1	1	0	1	1	1	52	0	52	0
2	43	2	1	2	0	0	2	1	3	1	1	1	1	0	1	0	1	52	0	52	0
2	46	2.8	2	1	0	0	2	1	4	1	1	1	1	0	0	1	1	52	0	52	0
2	51	3	2	2	0	0	2	1	3	2	1	1	1	0	1	1	1	51	0	51	0
2	56	2.1	2	2	0	0	3	1	6	1	1	1	1	0	1	1	1	51	0	51	0
2	64	1.6	1	2	0	0	2	1	4	4	1	1	1	0	1	1	0	52	0	52	0
2	57	1.5	1	1	0	0	2	1	3	1	1	1	1	0	1	1	0	52	0	52	0
2	44	NA	NA	2	0	NA	NA	1	5	1	NA	NA	NA	1	NA	1	0	52	0	52	0
2	43	2.2	2	1	0	0	2	1	3	1	1	1	1	1	1	1	1	52	0	52	0
2	45	1.8	1	1	0	0	3	1	3	1	1	0	1	0	1	1	1	51	0	51	0
2	41	1.8	1	2	0	0	2	1	2	1	1	1	1	0	1	1	1	51	0	51	0
2	37	3.5	2	2	0	0	3	1	6	1	0	0	0	0	1	1	1	50	0	50	0
2	46	NA	NA	2	0	NA	NA	1	3	1	1	0	1	0	1	0	1	50	0	50	0
2	74	0.8	1	1	0	0	2	1	3	1	1	1	1	0	1	1	0	50	0	50	0
2	42	2.3	2	2	0	0	1	2	5	3	1	1	1	0	1	1	1	50	0	50	0
2	46	1.8	1	2	0	NA	2	2	4	2	1	1	1	0	1	1	1	50	0	50	0
2	62	3.5	2	1	0	0	2	1	3	1	1	1	1	NA	1	1	1	50	0	50	0
2	57	2.5	2	1	0	1	2	1	6	1	1	1	1	NA	1	1	0	50	0	50	0
2	49	2.5	2	1	0	0	3	1	3	0	1	1	1	1	1	1	1	50	0	50	0
2	62	2.2	2	2	0	0	2	2	4	2	1	0	1	0	1	1	1	50	0	50	0
2	44	0.5	1	2	0	0	2	1	4	1	1	1	1	1	1	1	1	49	0	49	0
2	65	2	1	1	0	0	NA	2	7	2	1	1	1	0	1	1	1	50	0	50	0
2	61	2.5	2	2	0	0	3	1	5	0	1	1	1	0	1	1	1	49	0	49	0
2	52	1.8	1	2	0	0	2	2	5	2	1	1	1	0	1	1	1	49	0	49	0
2	48	3	2	2	0	0	2	1	5	1	1	1	1	0	1	1	1	49	0	49	0
2	38	1.2	1	2	0	0	2	1	2	1	1	1	1	NA	1	1	1	49	0	49	0
2	62	1.4	1	1	0	0	2	1	3	1	1	1	1	NA	1	0	0	49	0	49	0
2	53	2.1	2	1	0	0	3	1	2	1	0	0	0	1	1	1	0	49	0	49	0
2	45	1.6	1	2	0	0	1	1	3	1	1	1	1	0	1	1	1	49	0	49	0
2	38	2	1	1	0	0	NA	1	5	1	1	1	1	0	1	1	1	49	0	49	0
2	50	1.7	1	2	0	0	2	1	5	1	1	1	1	1	1	1	1	49	0	49	0
2	40	2	1	1	0	0	2	1	6	1	1	1	1	0	1	1	1	49	0	49	0
2	44	1.7	1	1	0	0	2	2	6	2	1	1	1	NA	1	1	1	48	0	48	0
2	44	2.2	2	1	0	1	2	1	3	1	1	1	1	0	0	1	1	49	0	49	0
2	52	3	2	1	0	0	1	1	3	1	1	1	1	0	1	1	1	48	0	48	0
2	61	1.5	1	2	0	0	3	1	4	1	1	0	1	0	1	1	1	48	0	48	0
2	40	3	2	2	0	0	3	2	6	2	1	1	1	1	1	1	1	18	0	18	0
2	46	1.5	1	2	0	0	2	2	4	2	1	1	1	0	1	1	1	48	0	48	0
2	49	3	2	1	0	0	2	1	4	1	1	1	1	1	1	1	1	48	0	48	0
2	71	1.8	1	1	0	0	2	1	3	1	1	1	1	0	1	0	0	48	0	48	0
2	51	NA	NA	2	0	NA	NA	1	4	1	0	0	0	0	1	1	1	48	0	48	0
2	43	0.6	1	1	0	0	2	2	3	2	1	1	1	0	1	1	1	48	0	48	0
2	70	2.2	2	2	0	0	NA	1	3	1	1	1	1	0	0	1	0	48	0	48	0
2	42	3	2	2	0	0	2	1	4	1	1	1	1	0	1	1	1	48	0	48	0
2	48	2.3	2	2	0	0	2	1	4	1	1	1	1	0	1	1	0	48	0	48	0
2	50	1	1	1	0	0	2	1	3	1	1	1	1	0	0	1	0	47	0	47	0
2	65	2.5	2	1	0	0	2	3	6	3	1	1	1	0	1	1	1	47	0	47	0
2	60	2	1	1	0	1	3	1	3	1	1	1	1	0	1	1	0	47	0	47	0
2	68	2.5	2	1	0	NA	NA	1	4	1	1	0	1	0	0	1	0	47	0	47	0
2	51	2.2	2	2	0	0	2	1	3	1	1	1	1	0	1	1	1	48	0	48	0
2	44	2	1	2	0	0	1	1	4	1	1	1	1	0	0	1	0	47	0	47	0
2	48	2	1	1	0	0	1	1	3	1	1	1	1	0	0	0	0	47	0	47	0
2	52	2	1	1	0	0	1	1	2	1	1	1	1	0	0	1	1	47	0	47	0
2	50	1.5	1	2	0	0	2	1	5	1	1	1	1	0	1	0	1	23	0	23	0
2	32	2	1	1	0	0	2	1	4	1	1	1	1	0	1	1	0	47	0	47	0
2	39	4.5	2	1	0	0	2	1	3	1	1	1	1	0	1	1	0	47	0	47	0
2	34	0.8	1	1	0	0	2	1	5	1	1	1	1	0	1	1	0	46	0	46	0
2	58	3	2	1	0	NA	NA	1	5	1	1	1	1	NA	1	1	1	46	0	46	0
2	68	3	2	1	0	0	2	1	4	1	1	1	1	0	1	0	0	47	0	47	0
2	57	2.5	2	1	0	0	3	1	5	1	1	1	1	1	1	1	1	46	0	46	0
2	38	NA	NA	1	0	0	2	1	4	1	1	1	1	0	1	1	1	46	0	46	0
2	44	1.8	1	1	0	0	2	1	3	1	1	1	1	0	1	1	1	45	0	45	0
2	41	2	1	1	0	0	2	1	3	1	0	0	0	1	1	1	0	46	0	46	0
2	40	2.5	2	1	0	0	2	2	3	2	1	1	1	0	1	1	1	46	0	46	0
2	53	2.8	2	2	0	0	2	1	1	1	1	1	1	NA	1	1	1	45	0	45	0
2	48	1.5	1	1	0	0	2	1	5	1	1	1	1	0	1	0	0	44	1	11	1
2	52	2.5	2	1	0	0	3	1	4	1	0	0	0	0	1	1	1	45	0	45	0
2	61	2	1	2	0	NA	NA	1	4	1	1	1	1	0	1	1	1	44	0	44	0
2	55	1.8	1	1	0	0	1	1	4	1	1	1	1	0	1	1	1	44	0	44	0
2	59	2.5	2	2	0	0	3	1	1	1	1	1	1	0	1	1	1	45	0	45	0
2	51	3	2	1	0	0	2	1	3	1	1	1	1	0	1	1	1	45	0	45	0
2	52	2.5	2	1	0	0	1	1	3	1	1	1	1	0	0	1	1	45	0	45	0
2	48	NA	NA	2	0	NA	NA	1	4	1	1	1	1	0	0	1	0	45	0	45	0
2	45	2	1	2	0	0	3	2	6	2	1	1	1	0	1	1	1	44	0	44	0
2	58	3.5	2	2	0	0	2	1	4	1	1	1	1	NA	1	1	1	44	0	44	0
2	46	1	1	2	0	0	1	1	4	1	1	1	1	0	1	0	1	43	0	43	0
2	52	2	1	2	0	0	2	1	3	1	1	1	1	0	1	1	1	44	0	44	0
2	77	NA	1	2	0	0	2	2	3	2	1	1	1	0	0	0	1	43	0	43	0
2	54	4	2	1	0	1	2	2	3	2	1	1	1	0	1	1	1	44	0	44	0
